# Supplementary material for: Interaction of a Porphyrin Aluminum Metal–Organic Framework with Volatile Organic Sulfur Compound Diethyl Sulfide Studied via In Situ and Ex Situ Experiments and DFT Computations
Source: MDPI journal article supplement (doi:10.3390/nano13222916), 2023-11-08
Supplement: s1 [file s1]

## **Supplementary Materials**

### **Interaction of a Porphyrin Aluminum Metal–Organic Framework with Volatile Organic Sulfur Compound Diethyl Sulfide Studied via In Situ and Ex Situ Experiments and DFT Computations**

Shaheed Ullah <sup>1</sup>, Michael L. McKee <sup>2</sup>, and Alexander Samokhvalov <sup>1\*</sup>

<sup>1</sup> Department of Chemistry, Morgan State University, 1700 East Cold Spring Lane, Baltimore, MD 21251, USA.

<sup>2</sup> Department of Chemistry and Biochemistry, 179 Chemistry Building, Auburn University, Auburn, AL 36849, USA.

\* The corresponding author.

## Materials and Methods

### *Instrumental characterization of samples*

The FTIR spectra were collected by Nicolet iS10 spectrometer in the ATR-FTIR mode. This spectrometer was equipped with ATR assembly of model Golden Gate (part number GS10500 from Specac, Fort Washington, PA, USA) with a diamond ATR crystal. The software for data acquisition was OMNIC, where spectral resolution was  $4\text{ cm}^{-1}$  and optical aperture at “Open”.

To avoid effects of water vapor in ambient air on spectra, the interior of the FTIR spectrometer has been purged with the IR purge gas (dried air of very low humidity) at flow rate 30 scfh (standard cubic feet per hour) as measured by flowmeter (model RMA-7 from Dwyer Instruments, Michigan City, IN, USA). Dried air was generated by FT-IR Purge Gas Generator (model 74-5041 Parker Balston, from Parker Hannifin Corporation, Haverhill, MA, USA) which contains a built-in air compressor. This unit creates dried air of the spectroscopic quality; the remaining water vapor content (per specifications) is equivalent to a dewpoint of  $-100\text{ }^{\circ}\text{F}$  ( $-73\text{ }^{\circ}\text{C}$ ) which corresponds to relative humidity  $\text{RH} < 1\%$ . Additionally, this purge gas generator removes  $\text{CO}_2$  from the air to less than 1 ppm. To monitor the quality of FTIR spectra continuously and remove any remaining artifacts due to trace water vapor, in the OMNIC program the “Atmospheric Correction” parameter was enabled, and “Spectral Quality Results” parameter set at “ $\text{H}_2\text{O}$  level”  $\geq 95\%$ . The obtained ATR-FTIR spectra have been plotted in the absorbance mode. Numeric peak fitting of the ATR-FTIR spectra was conducted by OriginPro 2016 program from OriginLab, Northampton, MA, USA.

The Raman spectra were collected using confocal Raman microscope model XploRA Plus from Horiba Scientific, Piscataway, NJ, USA. The magnification of objective was x50 and the 405 nm laser was used at 1 % of maximum power. A small amount of compound 2 was placed on the microscope glass slide, covered with thin microscope glass cover slide, and Raman spectra of specimen were collected; in work with compound 2 and DES, additionally few drops of DES were added. The Raman spectra were collected in the range  $70\text{--}2000\text{ cm}^{-1}$ .

Powder X-Ray diffraction (XRD) traces were collected by the diffractometer model MiniFlex from Rigaku, Auburn Hills, MI, USA. It uses X-rays at the Cu K-alpha line of 0.15418 nm and increments of the  $2\theta$  angle were at 0.02 degrees.

### *Fabrication of hemi-spherical gas flow spectroscopic mini-chamber*

The hemispherical body of the described spectroscopic mini-chamber was fabricated from a template: transparent acrylic dome (hemisphere) of 1" diameter (from SupremeTech), shown in Figure S1. First, the through hole was drilled at the center of the top of the template, to accommodate the screw of the ATR assembly. Then, the hemisphere template was inverted, its internal volume filled with colorless transparent epoxy mixed with hardener (Doctor Resin & Chemicals, Sarzana (SP), Italy), then stainless steel sapphire anvil (product 10531 from Specac) with its tip up was placed inside the mixture. The mixture was leveled to the edges of the inverted hemisphere, to create the empty internal volume of this spectroscopic mini-chamber at only a few cubic millimeters. The mixture inside the template was allowed to solidify for 24 hours. Then, two holes were drilled through the front and rear sides of spectroscopic mini-chamber and two pieces of soft silicone tubing (of 1/16" ID x 1/8" OD) were inserted to the holes, to create gas inlet port (see 4 in Figure 3) and gas outlet port (see 5 in Figure 3). In this design, gas inlet port and gas outlet port can be interchangeably used. Finally, to ensure gas tightness, a flat adhesive mini O-ring was cut from soft silicone adhesive sheet (hardness 50 Durometer) of 1 mm thick, placed between the mini-chamber and the ATR baseplate, and the ATR bridge assembly was locked.

## Results and Discussion

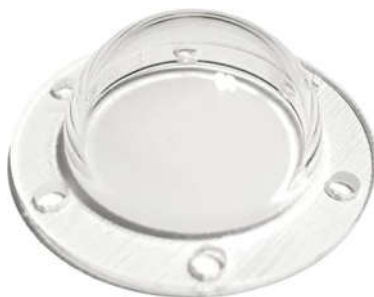

**Figure S1.** The starting template for making spectroscopic mini-chamber.

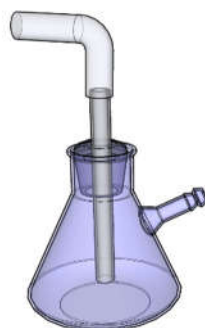

**Figure S2.** Facile in-flow vapor saturation setup for the flow of DES vapor in dried air.

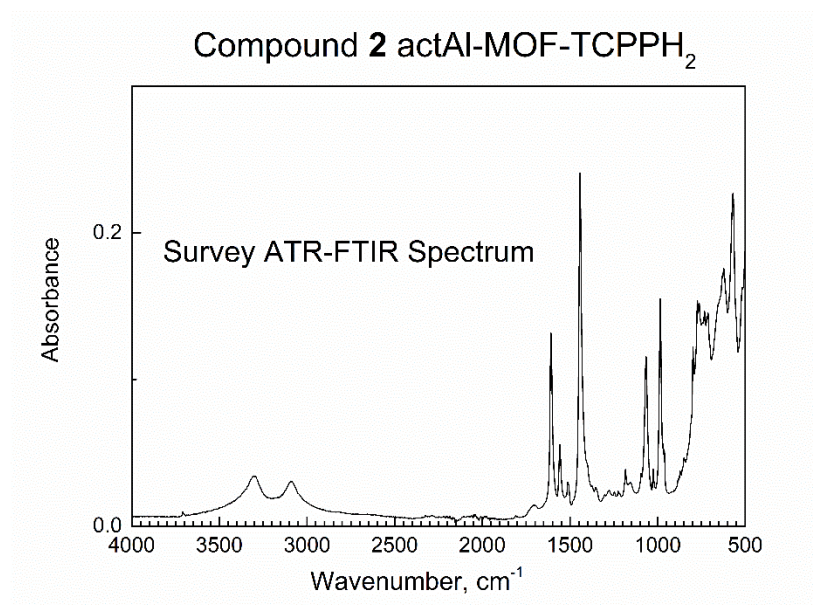

**Figure S3.** The survey ATR-FTIR spectrum of compound **2** actAl-MOF-TCPPH<sub>2</sub>.

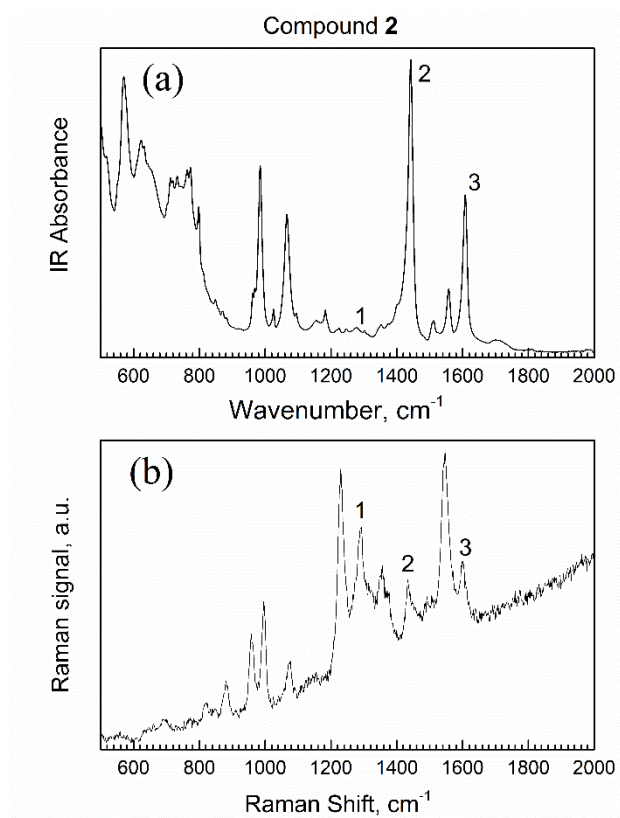

**Figure S4.** Vibrational spectra of compound 2. (a) ATR-FTIR. (b) Raman.

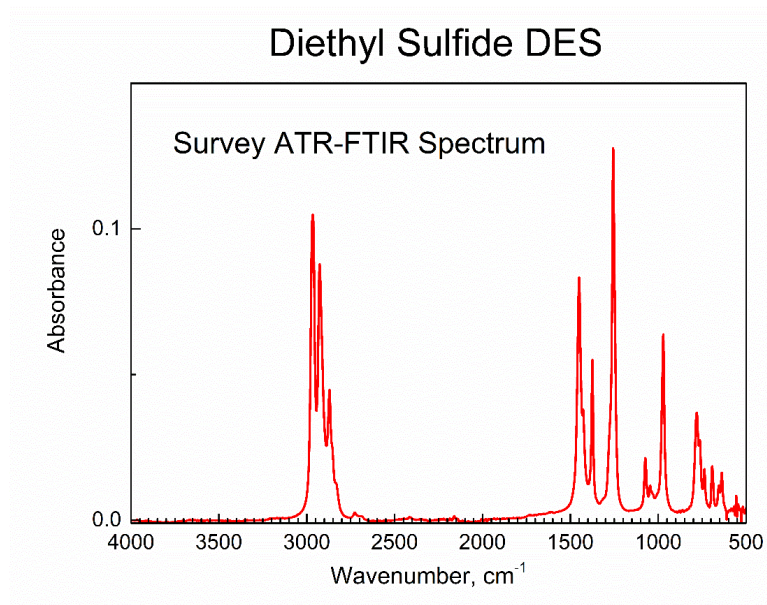

**Figure S5.** The survey ATR-FTIR spectrum of liquid DES.

**Table S1.** Assignments of major ATR-FTIR peaks of DES.

| The wavenumber (this work), $\text{cm}^{-1}$ | The wavenumber (literature), $\text{cm}^{-1}$ | Assignments                               |
|----------------------------------------------|-----------------------------------------------|-------------------------------------------|
| 2965                                         | 2970                                          | $\text{CH}_2$ antisymm. str.              |
| 2926                                         | 2929                                          | $\text{CH}_3$ str, $\text{CH}_2$ sym. str |
| 2870                                         | 2871                                          | $\text{CH}_3$ sym. str                    |
| 1450                                         | 1451                                          | $\text{CH}_3$ def                         |
| 1427                                         | 1427                                          | $\text{CH}_2$ sciss                       |
| 1257                                         | 1258                                          | $\text{CH}_2$ wag                         |
| 1047 w                                       | 1046                                          | $\text{CH}_3$ rock                        |
| 971                                          | 972                                           | C-C str.                                  |
| 780 wide                                     | 781                                           | -                                         |
| 762 w, sh.                                   | 764                                           | -                                         |
| 693                                          | 694                                           | S-C str.                                  |

Notations: str = stretch; def = deformation; sciss = scission; wag = wagging; rock = rocking.

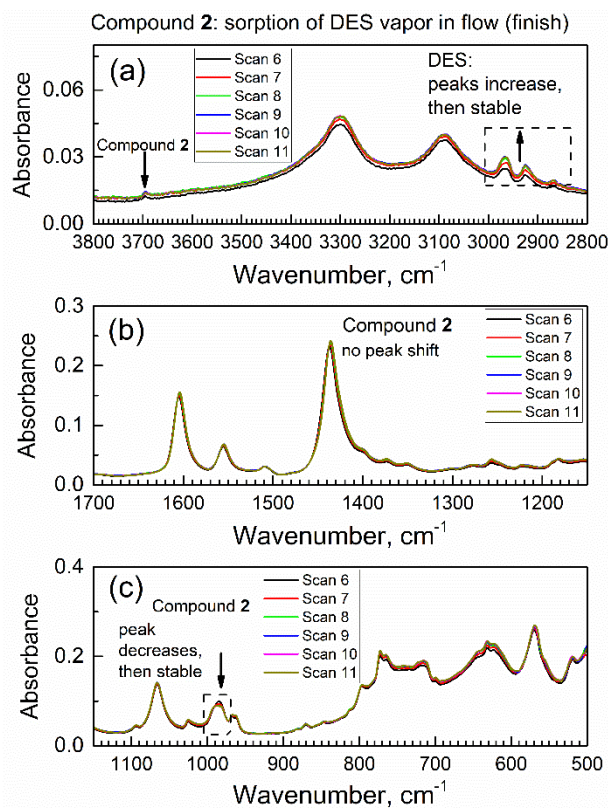

**Figure S6.** The second set (9.7-19.2 min.) of *in-situ* time-dependent ATR-FTIR spectra of compound 2 in the flow of DES vapor in dried air. (a) high wavenumbers. (b) the mid-IR. (c) low wavenumbers.

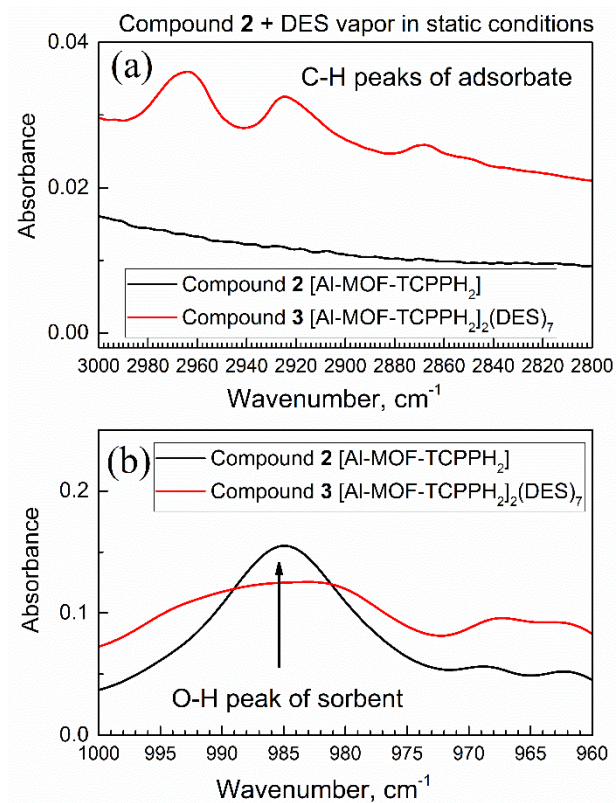

**Figure S7.** The ATR-FTIR spectra of *act*Al-MOF-TCPPh<sub>2</sub> (compound 2) and its adsorption complex with DES (compound 3). (a) the C-H peaks of adsorbate. (b) the O-H peak of sorbent.

**Table S2.** Absolute Energies, E, computed at B3LYP/6-311G(d,p)+D3BJ level, Basis Set Superposition Errors (BSSE), Zero-point Energies (ZPE), Number of Imaginary Frequencies (NIMAG), Heat Capacity Corrections  $C_p$ , and Entropies S at Optimized B3LYP/6-31G(d)+D3BJ Geometries.

| Species                                     | PG       | Notation  | E, Hartree    | BSSE, kcal/mol | ZPE, kcal/mol (NIMAG) | $C_p$ , kcal/mol | S, cal/mol-K |
|---------------------------------------------|----------|-----------|---------------|----------------|-----------------------|------------------|--------------|
| DES                                         | $C_{2v}$ | er11      | -556.735628   | -              | 84.21(0)              | 5.28             | 83.40        |
| Model #1 porphyrin rings close              |          |           |               |                |                       |                  |              |
| Al-TCPPH <sub>2</sub>                       | $C_2$    | er5aa     | -12955.778926 | -              | 1378.44(1)            | 122.82           | 896.62       |
| 2DES@Al-TCPPH <sub>2</sub>                  | $C_2$    | er7a      | -14069.323937 | 5.34           | 1548.98(2)            | 133.55           | 980.13       |
| Model #2 porphyrin rings separated by 6.0 Å |          |           |               |                |                       |                  |              |
| Al-TCPPH <sub>2</sub> -fix                  | $C_s$    | er5aa-f   | -12955.757621 | -              | 1377.37(2)            | 122.95           | 908.64       |
| DES@Al-TCPPH <sub>2</sub> -fix              | $C_s$    | er7bb-f2x | -13512.531138 | 5.03           | 1463.82(0)            | 129.24           | 953.54       |

**Table S3.** Number (and Values) of Imaginary Frequencies for Calculated Structures and Corrections to Entropy due to Different Number of Imaginary Frequencies (a).

| Species                        | Notation                                    | NIMAG<br>(values) | S,<br>cal/mol-K | Correction to Entropy,<br>cal/mol-K | Corrected<br>S, cal/mol-K | -TΔS,<br>kcal/mol<br>(b) |
|--------------------------------|---------------------------------------------|-------------------|-----------------|-------------------------------------|---------------------------|--------------------------|
| DES                            | er11                                        | 0                 | 83.40           | -                                   | 83.40                     | -                        |
|                                | Model #1 porphyrin rings close              |                   |                 |                                     |                           |                          |
| Al-TCPPH <sub>2</sub>          | er5aa                                       | 1 (170i)          | 896.62          | 2.44                                | 899.06                    | -                        |
| 2DES@Al-TCPPH <sub>2</sub>     | er7a                                        | 2 (170i, 33i)     | 980.13          | 8.08                                | 988.21                    | +23.15                   |
|                                | Model #2 porphyrin rings separated by 6.0 Å |                   |                 |                                     |                           |                          |
| Al-TCPPH <sub>2</sub> -fix     | er5aa-f                                     | 2 (7i, 6i)        | 908.64          | 17.75                               | 926.39                    | -                        |
| DES@Al-TCPPH <sub>2</sub> -fix | er7bb-f2x                                   | 0                 | 953.54          | -                                   | 953.54                    | +16.77                   |

(a) The entropy corrections are very sensitive to small magnitude vibrations. To compute the free energies of binding, imaginary frequencies were considered as real modes and added to the total entropy.

(b) The total TΔS (at 298 K) value in kcal/mol for binding of one or two DES molecules inside Al-TCPPH<sub>2</sub>.



**Table S4.** Optimized Structures of DES, Al-TCPPH<sub>2</sub>, 2DES@Al-TCPPH<sub>2</sub>, and DES@Al-TCPPH<sub>2</sub> at the B3LYP/6-31G(d)+D3BJ Level.

1. DES aka al-linker11

Standard orientation:

| Center<br>Number | Atomic<br>Number | Atomic<br>Type | Coordinates (Angstroms) |           |           |
|------------------|------------------|----------------|-------------------------|-----------|-----------|
|                  |                  |                | X                       | Y         | Z         |
| 1                | 16               | 0              | -0.000000               | 0.000000  | 0.565368  |
| 2                | 6                | 0              | -0.000000               | 1.398952  | -0.622444 |
| 3                | 1                | 0              | -0.886329               | 1.319023  | -1.262240 |
| 4                | 1                | 0              | 0.886329                | 1.319023  | -1.262240 |
| 5                | 6                | 0              | -0.000000               | -1.398952 | -0.622444 |
| 6                | 1                | 0              | -0.886329               | -1.319023 | -1.262240 |
| 7                | 1                | 0              | 0.886329                | -1.319023 | -1.262240 |
| 8                | 6                | 0              | 0.000000                | -2.727524 | 0.130226  |
| 9                | 1                | 0              | -0.886349               | -2.820246 | 0.766348  |
| 10               | 1                | 0              | 0.000000                | -3.563675 | -0.577854 |
| 11               | 1                | 0              | 0.886349                | -2.820246 | 0.766348  |
| 12               | 6                | 0              | 0.000000                | 2.727524  | 0.130226  |
| 13               | 1                | 0              | 0.000000                | 3.563675  | -0.577854 |
| 14               | 1                | 0              | -0.886349               | 2.820246  | 0.766348  |
| 15               | 1                | 0              | 0.886349                | 2.820246  | 0.766348  |

Model#1 porphyrin rings close

2. Al-TCPPH<sub>2</sub> C<sub>s</sub> symmetry "Al-TCPPH<sub>2</sub>" aka al-linker5aa

Standard orientation:

| Center<br>Number | Atomic<br>Number | Atomic<br>Type | Coordinates (Angstroms) |          |           |
|------------------|------------------|----------------|-------------------------|----------|-----------|
|                  |                  |                | X                       | Y        | Z         |
| 1                | 8                | 0              | 8.506767                | 6.554381 | -0.930434 |
| 2                | 8                | 0              | 8.483926                | 3.392936 | 0.991094  |
| 3                | 8                | 0              | 7.360955                | 4.213998 | -1.415476 |
| 4                | 8                | 0              | 9.804561                | 1.137896 | 1.479627  |
| 5                | 8                | 0              | 6.719184                | 5.344177 | 0.972731  |
| 6                | 8                | 0              | 9.521708                | 2.001783 | -1.125650 |
| 7                | 8                | 0              | 9.556244                | 5.634728 | 1.352138  |
| 8                | 8                | 0              | 6.748740                | 2.208534 | -0.600563 |
| 9                | 8                | 0              | 10.090317               | 4.199061 | -1.123905 |
| 10               | 8                | 0              | 7.072264                | 1.131143 | 1.785180  |
| 11               | 1                | 0              | 9.184908                | 3.534135 | 1.646964  |
| 12               | 1                | 0              | 6.099648                | 4.804092 | -3.517803 |
| 13               | 1                | 0              | 4.321118                | 4.500025 | -5.242739 |
| 14               | 1                | 0              | 4.479587                | 4.607141 | 1.767403  |
| 15               | 1                | 0              | -2.894191               | 1.042382 | -3.152638 |
| 16               | 1                | 0              | 2.894191                | 1.042382 | -3.152638 |
| 17               | 1                | 0              | 4.726195                | 1.306391 | -1.474804 |
| 18               | 1                | 0              | 5.277623                | 2.138920 | 3.076584  |
| 19               | 1                | 0              | -4.321118               | 4.500025 | -5.242739 |
| 20               | 13               | 0              | 8.287081                | 1.679652 | 0.374016  |

|    |    |   |            |           |           |
|----|----|---|------------|-----------|-----------|
| 21 | 13 | 0 | 8.654231   | 4.998511  | -0.083750 |
| 22 | 6  | 0 | 5.399452   | 3.978296  | -3.452794 |
| 23 | 6  | 0 | 4.404999   | 3.805215  | -4.412515 |
| 24 | 6  | 0 | 4.498151   | 5.186284  | 2.684565  |
| 25 | 6  | 0 | -3.602408  | 1.858834  | -3.233397 |
| 26 | 6  | 0 | 3.602408   | 1.858834  | -3.233397 |
| 27 | 6  | 0 | 4.611673   | 2.010200  | -2.291048 |
| 28 | 6  | 0 | 4.817292   | 1.211579  | 3.399133  |
| 29 | 6  | 0 | -4.404999  | 3.805215  | -4.412515 |
| 30 | 6  | 0 | 5.518739   | 3.072637  | -2.393787 |
| 31 | 6  | 0 | 3.494806   | 2.740404  | -4.318441 |
| 32 | 6  | 0 | 5.669261   | 5.896539  | 3.004052  |
| 33 | 6  | 0 | -3.494806  | 2.740404  | -4.318441 |
| 34 | 6  | 0 | 6.624643   | 3.190234  | -1.395039 |
| 35 | 6  | 0 | 10.256570  | 0.000000  | 1.779175  |
| 36 | 6  | 0 | 6.833924   | 5.817188  | 2.094361  |
| 37 | 6  | 0 | 10.211408  | 3.002444  | -1.478007 |
| 38 | 8  | 0 | -8.506767  | 6.554381  | -0.930434 |
| 39 | 8  | 0 | -8.483926  | 3.392936  | 0.991094  |
| 40 | 8  | 0 | -10.090317 | 4.199061  | -1.123905 |
| 41 | 8  | 0 | -7.072264  | 1.131143  | 1.785180  |
| 42 | 8  | 0 | -9.556244  | 5.634728  | 1.352138  |
| 43 | 8  | 0 | -6.748740  | 2.208534  | -0.600563 |
| 44 | 8  | 0 | -6.719184  | 5.344177  | 0.972731  |
| 45 | 8  | 0 | -9.521708  | 2.001783  | -1.125650 |
| 46 | 8  | 0 | -7.360955  | 4.213998  | -1.415476 |
| 47 | 8  | 0 | -9.804561  | 1.137896  | 1.479627  |
| 48 | 1  | 0 | -9.184908  | 3.534135  | 1.646964  |
| 49 | 1  | 0 | -5.277623  | 2.138920  | 3.076584  |
| 50 | 1  | 0 | -4.726195  | 1.306391  | -1.474804 |
| 51 | 1  | 0 | -4.479587  | 4.607141  | 1.767403  |
| 52 | 1  | 0 | -6.099648  | 4.804092  | -3.517803 |
| 53 | 13 | 0 | -8.287081  | 1.679652  | 0.374016  |
| 54 | 13 | 0 | -8.654231  | 4.998511  | -0.083750 |
| 55 | 6  | 0 | -4.817292  | 1.211579  | 3.399133  |
| 56 | 6  | 0 | -4.611673  | 2.010200  | -2.291048 |
| 57 | 6  | 0 | -4.498151  | 5.186284  | 2.684565  |
| 58 | 6  | 0 | -5.399452  | 3.978296  | -3.452794 |
| 59 | 6  | 0 | -5.396570  | -0.000000 | 2.999753  |
| 60 | 6  | 0 | -5.518739  | 3.072637  | -2.393787 |
| 61 | 6  | 0 | -10.211408 | 3.002444  | -1.478007 |
| 62 | 6  | 0 | -6.614829  | -0.000000 | 2.116493  |
| 63 | 6  | 0 | -6.624643  | 3.190234  | -1.395039 |
| 64 | 8  | 0 | 8.160099   | 0.000000  | -0.393894 |
| 65 | 8  | 0 | 8.483926   | -3.392936 | 0.991094  |
| 66 | 8  | 0 | 6.748740   | -2.208534 | -0.600563 |
| 67 | 8  | 0 | 9.556244   | -5.634728 | 1.352138  |
| 68 | 8  | 0 | 7.072264   | -1.131143 | 1.785180  |
| 69 | 8  | 0 | 10.090317  | -4.199061 | -1.123905 |
| 70 | 8  | 0 | 9.804561   | -1.137896 | 1.479627  |
| 71 | 8  | 0 | 7.360955   | -4.213998 | -1.415476 |
| 72 | 8  | 0 | 9.521708   | -2.001783 | -1.125650 |
| 73 | 8  | 0 | 6.719184   | -5.344177 | 0.972731  |
| 74 | 1  | 0 | 8.648787   | 0.000000  | -1.229801 |
| 75 | 1  | 0 | 9.184908   | -3.534135 | 1.646964  |
| 76 | 1  | 0 | 4.726195   | -1.306391 | -1.474804 |

|     |    |   |            |           |           |
|-----|----|---|------------|-----------|-----------|
| 77  | 1  | 0 | 2.894191   | -1.042382 | -3.152638 |
| 78  | 1  | 0 | 5.277623   | -2.138920 | 3.076584  |
| 79  | 1  | 0 | -4.321118  | -4.500025 | -5.242739 |
| 80  | 1  | 0 | 4.321118   | -4.500025 | -5.242739 |
| 81  | 1  | 0 | 6.099648   | -4.804092 | -3.517803 |
| 82  | 1  | 0 | 4.479587   | -4.607141 | 1.767403  |
| 83  | 1  | 0 | -2.894191  | -1.042382 | -3.152638 |
| 84  | 13 | 0 | 8.654231   | -4.998511 | -0.083750 |
| 85  | 13 | 0 | 8.287081   | -1.679652 | 0.374016  |
| 86  | 6  | 0 | 4.611673   | -2.010200 | -2.291048 |
| 87  | 6  | 0 | 3.602408   | -1.858834 | -3.233397 |
| 88  | 6  | 0 | 4.817292   | -1.211579 | 3.399133  |
| 89  | 6  | 0 | -4.404999  | -3.805215 | -4.412515 |
| 90  | 6  | 0 | 4.404999   | -3.805215 | -4.412515 |
| 91  | 6  | 0 | 5.399452   | -3.978296 | -3.452794 |
| 92  | 6  | 0 | 4.498151   | -5.186284 | 2.684565  |
| 93  | 6  | 0 | -3.602408  | -1.858834 | -3.233397 |
| 94  | 6  | 0 | 5.518739   | -3.072637 | -2.393787 |
| 95  | 6  | 0 | 3.494806   | -2.740404 | -4.318441 |
| 96  | 6  | 0 | 5.396570   | -0.000000 | 2.999753  |
| 97  | 6  | 0 | -3.494806  | -2.740404 | -4.318441 |
| 98  | 6  | 0 | 6.624643   | -3.190234 | -1.395039 |
| 99  | 6  | 0 | 6.614829   | -0.000000 | 2.116493  |
| 100 | 6  | 0 | 10.211408  | -3.002444 | -1.478007 |
| 101 | 8  | 0 | -8.160099  | 0.000000  | -0.393894 |
| 102 | 8  | 0 | -8.483926  | -3.392936 | 0.991094  |
| 103 | 8  | 0 | -9.521708  | -2.001783 | -1.125650 |
| 104 | 8  | 0 | -6.719184  | -5.344177 | 0.972731  |
| 105 | 8  | 0 | -9.804561  | -1.137896 | 1.479627  |
| 106 | 8  | 0 | -7.360955  | -4.213998 | -1.415476 |
| 107 | 8  | 0 | -7.072264  | -1.131143 | 1.785180  |
| 108 | 8  | 0 | -10.090317 | -4.199061 | -1.123905 |
| 109 | 8  | 0 | -6.748740  | -2.208534 | -0.600563 |
| 110 | 8  | 0 | -9.556244  | -5.634728 | 1.352138  |
| 111 | 1  | 0 | -8.648787  | 0.000000  | -1.229801 |
| 112 | 1  | 0 | -9.184908  | -3.534135 | 1.646964  |
| 113 | 1  | 0 | -4.479587  | -4.607141 | 1.767403  |
| 114 | 1  | 0 | -6.099648  | -4.804092 | -3.517803 |
| 115 | 1  | 0 | -5.277623  | -2.138920 | 3.076584  |
| 116 | 1  | 0 | -4.726195  | -1.306391 | -1.474804 |
| 117 | 13 | 0 | -8.654231  | -4.998511 | -0.083750 |
| 118 | 13 | 0 | -8.287081  | -1.679652 | 0.374016  |
| 119 | 6  | 0 | -4.498151  | -5.186284 | 2.684565  |
| 120 | 6  | 0 | -5.399452  | -3.978296 | -3.452794 |
| 121 | 6  | 0 | -4.817292  | -1.211579 | 3.399133  |
| 122 | 6  | 0 | -4.611673  | -2.010200 | -2.291048 |
| 123 | 6  | 0 | -5.669261  | -5.896539 | 3.004052  |
| 124 | 6  | 0 | -5.518739  | -3.072637 | -2.393787 |
| 125 | 6  | 0 | -10.211408 | -3.002444 | -1.478007 |
| 126 | 6  | 0 | -6.833924  | -5.817188 | 2.094361  |
| 127 | 6  | 0 | -10.256570 | 0.000000  | 1.779175  |
| 128 | 6  | 0 | -6.624643  | -3.190234 | -1.395039 |
| 129 | 8  | 0 | 0.000000   | 3.300658  | 6.163025  |
| 130 | 8  | 0 | 0.000000   | 6.717016  | 7.354777  |
| 131 | 8  | 0 | -1.384975  | 1.125278  | 5.777340  |
| 132 | 8  | 0 | 1.412904   | 4.501571  | 8.116232  |

|     |    |   |           |           |          |
|-----|----|---|-----------|-----------|----------|
| 133 | 8  | 0 | -1.355364 | 2.237302  | 8.253193 |
| 134 | 8  | 0 | 1.354737  | 5.344222  | 5.459428 |
| 135 | 8  | 0 | 1.355364  | 2.237302  | 8.253193 |
| 136 | 8  | 0 | -1.354737 | 5.344222  | 5.459428 |
| 137 | 8  | 0 | 1.384975  | 1.125278  | 5.777340 |
| 138 | 8  | 0 | -1.412904 | 4.501571  | 8.116232 |
| 139 | 1  | 0 | 0.844063  | 3.257528  | 5.696274 |
| 140 | 1  | 0 | -3.218045 | 2.144716  | 4.506653 |
| 141 | 1  | 0 | 2.505554  | 4.679347  | 3.331254 |
| 142 | 1  | 0 | -2.505554 | 4.679347  | 3.331254 |
| 143 | 1  | 0 | 3.218045  | 2.144716  | 4.506653 |
| 144 | 13 | 0 | 0.000000  | 5.008265  | 6.900689 |
| 145 | 13 | 0 | 0.000000  | 1.645912  | 6.988807 |
| 146 | 6  | 0 | -3.672909 | 1.212446  | 4.189464 |
| 147 | 6  | 0 | 3.415829  | 5.229334  | 3.543062 |
| 148 | 6  | 0 | -3.415829 | 5.229334  | 3.543062 |
| 149 | 6  | 0 | 3.672909  | 1.212446  | 4.189464 |
| 150 | 6  | 0 | -3.488805 | 6.002884  | 4.720079 |
| 151 | 6  | 0 | 3.091320  | 0.000000  | 4.589961 |
| 152 | 6  | 0 | -2.372550 | 6.025450  | 5.645967 |
| 153 | 6  | 0 | 1.815045  | 3.374094  | 8.524369 |
| 154 | 6  | 0 | -1.815045 | 3.374094  | 8.524369 |
| 155 | 6  | 0 | 1.870776  | 0.000000  | 5.442552 |
| 156 | 8  | 0 | -0.000000 | -3.300658 | 6.163025 |
| 157 | 8  | 0 | -0.000000 | -0.000000 | 7.829007 |
| 158 | 8  | 0 | -1.354737 | -5.344222 | 5.459428 |
| 159 | 8  | 0 | 1.355364  | -2.237302 | 8.253193 |
| 160 | 8  | 0 | -1.412904 | -4.501571 | 8.116232 |
| 161 | 8  | 0 | 1.384975  | -1.125278 | 5.777340 |
| 162 | 8  | 0 | 1.412904  | -4.501571 | 8.116232 |
| 163 | 8  | 0 | -1.384975 | -1.125278 | 5.777340 |
| 164 | 8  | 0 | 1.354737  | -5.344222 | 5.459428 |
| 165 | 8  | 0 | -1.355364 | -2.237302 | 8.253193 |
| 166 | 1  | 0 | -0.844063 | -3.257528 | 5.696274 |
| 167 | 1  | 0 | -0.000000 | -0.000000 | 8.793795 |
| 168 | 1  | 0 | -2.505554 | -4.679347 | 3.331254 |
| 169 | 1  | 0 | 3.218045  | -2.144716 | 4.506653 |
| 170 | 1  | 0 | -3.218045 | -2.144716 | 4.506653 |
| 171 | 1  | 0 | 2.505554  | -4.679347 | 3.331254 |
| 172 | 13 | 0 | -0.000000 | -1.645912 | 6.988807 |
| 173 | 13 | 0 | -0.000000 | -5.008265 | 6.900689 |
| 174 | 6  | 0 | -3.415829 | -5.229334 | 3.543062 |
| 175 | 6  | 0 | 3.672909  | -1.212446 | 4.189464 |
| 176 | 6  | 0 | -3.672909 | -1.212446 | 4.189464 |
| 177 | 6  | 0 | 3.415829  | -5.229334 | 3.543062 |
| 178 | 6  | 0 | -3.091320 | 0.000000  | 4.589961 |
| 179 | 6  | 0 | 3.488805  | -6.002884 | 4.720079 |
| 180 | 6  | 0 | -1.870776 | 0.000000  | 5.442552 |
| 181 | 6  | 0 | 1.815045  | -3.374094 | 8.524369 |
| 182 | 6  | 0 | -1.815045 | -3.374094 | 8.524369 |
| 183 | 6  | 0 | 2.372550  | -6.025450 | 5.645967 |
| 184 | 6  | 0 | 5.751098  | 6.651540  | 4.179656 |
| 185 | 6  | 0 | 3.488805  | 6.002884  | 4.720079 |
| 186 | 6  | 0 | 5.669261  | -5.896539 | 3.004052 |
| 187 | 6  | 0 | 4.655224  | -6.718754 | 5.032577 |
| 188 | 6  | 0 | 4.655224  | 6.718754  | 5.032577 |

|     |   |   |            |           |           |
|-----|---|---|------------|-----------|-----------|
| 189 | 6 | 0 | 5.751098   | -6.651540 | 4.179656  |
| 190 | 1 | 0 | 6.669622   | 7.182731  | 4.411671  |
| 191 | 1 | 0 | 4.697338   | 7.307471  | 5.945003  |
| 192 | 1 | 0 | 6.669622   | -7.182731 | 4.411671  |
| 193 | 1 | 0 | 4.697338   | -7.307471 | 5.945003  |
| 194 | 6 | 0 | 2.372550   | 6.025450  | 5.645967  |
| 195 | 6 | 0 | 6.833924   | -5.817188 | 2.094361  |
| 196 | 1 | 0 | 2.431068   | 6.648882  | 6.547444  |
| 197 | 1 | 0 | 7.830778   | -6.150232 | 2.426650  |
| 198 | 6 | 0 | -4.655224  | 6.718754  | 5.032577  |
| 199 | 6 | 0 | -5.669261  | 5.896539  | 3.004052  |
| 200 | 6 | 0 | -3.488805  | -6.002884 | 4.720079  |
| 201 | 6 | 0 | -5.751098  | -6.651540 | 4.179656  |
| 202 | 1 | 0 | -4.697338  | 7.307471  | 5.945003  |
| 203 | 1 | 0 | -6.669622  | -7.182731 | 4.411671  |
| 204 | 6 | 0 | -5.751098  | 6.651540  | 4.179656  |
| 205 | 6 | 0 | -4.655224  | -6.718754 | 5.032577  |
| 206 | 1 | 0 | -4.697338  | -7.307471 | 5.945003  |
| 207 | 1 | 0 | -6.669622  | 7.182731  | 4.411671  |
| 208 | 6 | 0 | -2.372550  | -6.025450 | 5.645967  |
| 209 | 6 | 0 | -6.833924  | 5.817188  | 2.094361  |
| 210 | 1 | 0 | -2.431068  | -6.648882 | 6.547444  |
| 211 | 1 | 0 | -7.830778  | 6.150232  | 2.426650  |
| 212 | 1 | 0 | -2.431068  | 6.648882  | 6.547444  |
| 213 | 1 | 0 | -7.830778  | -6.150232 | 2.426650  |
| 214 | 1 | 0 | 2.431068   | -6.648882 | 6.547444  |
| 215 | 1 | 0 | 7.830778   | 6.150232  | 2.426650  |
| 216 | 1 | 0 | 11.171009  | 0.000000  | 2.392652  |
| 217 | 1 | 0 | -11.020494 | -2.788846 | -2.194598 |
| 218 | 1 | 0 | -11.020494 | 2.788846  | -2.194598 |
| 219 | 1 | 0 | 11.020494  | 2.788846  | -2.194598 |
| 220 | 1 | 0 | 11.020494  | -2.788846 | -2.194598 |
| 221 | 1 | 0 | 2.673615   | 3.395889  | 9.211031  |
| 222 | 1 | 0 | 2.673615   | -3.395889 | 9.211031  |
| 223 | 1 | 0 | -2.673615  | -3.395889 | 9.211031  |
| 224 | 1 | 0 | -2.673615  | 3.395889  | 9.211031  |
| 225 | 1 | 0 | -11.171009 | 0.000000  | 2.392652  |
| 226 | 8 | 0 | -0.000000  | -6.717016 | 7.354777  |
| 227 | 8 | 0 | -8.506767  | -6.554381 | -0.930434 |
| 228 | 8 | 0 | 8.506767   | -6.554381 | -0.930434 |
| 229 | 1 | 0 | -9.962334  | -6.471969 | 1.087898  |
| 230 | 1 | 0 | -9.962334  | 6.471969  | 1.087898  |
| 231 | 1 | 0 | 9.962334   | -6.471969 | 1.087898  |
| 232 | 1 | 0 | 9.962334   | 6.471969  | 1.087898  |
| 233 | 1 | 0 | 0.000000   | 6.852824  | 8.310315  |
| 234 | 1 | 0 | -7.991528  | 6.472262  | -1.742353 |
| 235 | 1 | 0 | 7.991528   | 6.472262  | -1.742353 |
| 236 | 1 | 0 | 7.991528   | -6.472262 | -1.742353 |
| 237 | 1 | 0 | -0.000000  | -6.852824 | 8.310315  |
| 238 | 1 | 0 | -7.991528  | -6.472262 | -1.742353 |
| 239 | 7 | 0 | 2.105482   | 2.094209  | -7.766519 |
| 240 | 7 | 0 | 0.000000   | 2.417405  | -5.767940 |
| 241 | 7 | 0 | -2.105482  | 2.094209  | -7.766519 |
| 242 | 7 | 0 | 0.000000   | 1.867820  | -9.787028 |
| 243 | 6 | 0 | 2.877595   | 1.876362  | -8.881502 |
| 244 | 6 | 0 | 4.239143   | 1.846033  | -8.439053 |

|     |   |   |           |           |            |
|-----|---|---|-----------|-----------|------------|
| 245 | 6 | 0 | 4.252263  | 2.062281  | -7.084895  |
| 246 | 6 | 0 | 2.893976  | 2.239514  | -6.650717  |
| 247 | 6 | 0 | 2.443077  | 2.529375  | -5.355208  |
| 248 | 6 | 0 | 1.090111  | 2.634723  | -4.969760  |
| 249 | 6 | 0 | 0.677826  | 3.028553  | -3.624883  |
| 250 | 6 | 0 | -0.677826 | 3.028553  | -3.624883  |
| 251 | 6 | 0 | -1.090111 | 2.634723  | -4.969760  |
| 252 | 6 | 0 | -2.443077 | 2.529375  | -5.355208  |
| 253 | 6 | 0 | -2.893976 | 2.239514  | -6.650717  |
| 254 | 6 | 0 | -4.252263 | 2.062281  | -7.084895  |
| 255 | 6 | 0 | -4.239143 | 1.846033  | -8.439053  |
| 256 | 6 | 0 | -2.877595 | 1.876362  | -8.881502  |
| 257 | 6 | 0 | -2.413835 | 1.764464  | -10.188100 |
| 258 | 6 | 0 | -1.084631 | 1.793556  | -10.609469 |
| 259 | 6 | 0 | -0.677981 | 1.707809  | -12.009403 |
| 260 | 6 | 0 | 0.677981  | 1.707809  | -12.009403 |
| 261 | 6 | 0 | 1.084631  | 1.793556  | -10.609469 |
| 262 | 6 | 0 | 2.413835  | 1.764464  | -10.188100 |
| 263 | 1 | 0 | 5.086869  | 1.677284  | -9.089236  |
| 264 | 1 | 0 | 5.109304  | 2.094833  | -6.429618  |
| 265 | 1 | 0 | 1.342977  | 3.285682  | -2.813639  |
| 266 | 1 | 0 | -1.342977 | 3.285682  | -2.813639  |
| 267 | 1 | 0 | -5.109304 | 2.094833  | -6.429618  |
| 268 | 1 | 0 | -5.086869 | 1.677284  | -9.089236  |
| 269 | 1 | 0 | -3.175099 | 1.643539  | -10.952880 |
| 270 | 1 | 0 | -1.352601 | 1.636295  | -12.853541 |
| 271 | 1 | 0 | 1.352601  | 1.636295  | -12.853541 |
| 272 | 1 | 0 | 3.175099  | 1.643539  | -10.952880 |
| 273 | 7 | 0 | -2.105482 | -2.094209 | -7.766519  |
| 274 | 7 | 0 | -0.000000 | -2.417405 | -5.767940  |
| 275 | 7 | 0 | 2.105482  | -2.094209 | -7.766519  |
| 276 | 7 | 0 | -0.000000 | -1.867820 | -9.787028  |
| 277 | 6 | 0 | -2.877595 | -1.876362 | -8.881502  |
| 278 | 6 | 0 | -4.239143 | -1.846033 | -8.439053  |
| 279 | 6 | 0 | -4.252263 | -2.062281 | -7.084895  |
| 280 | 6 | 0 | -2.893976 | -2.239514 | -6.650717  |
| 281 | 6 | 0 | -2.443077 | -2.529375 | -5.355208  |
| 282 | 6 | 0 | -1.090111 | -2.634723 | -4.969760  |
| 283 | 6 | 0 | -0.677826 | -3.028553 | -3.624883  |
| 284 | 6 | 0 | 0.677826  | -3.028553 | -3.624883  |
| 285 | 6 | 0 | 1.090111  | -2.634723 | -4.969760  |
| 286 | 6 | 0 | 2.443077  | -2.529375 | -5.355208  |
| 287 | 6 | 0 | 2.893976  | -2.239514 | -6.650717  |
| 288 | 6 | 0 | 4.252263  | -2.062281 | -7.084895  |
| 289 | 6 | 0 | 4.239143  | -1.846033 | -8.439053  |
| 290 | 6 | 0 | 2.877595  | -1.876362 | -8.881502  |
| 291 | 6 | 0 | 2.413835  | -1.764464 | -10.188100 |
| 292 | 6 | 0 | 1.084631  | -1.793556 | -10.609469 |
| 293 | 6 | 0 | 0.677981  | -1.707809 | -12.009403 |
| 294 | 6 | 0 | -0.677981 | -1.707809 | -12.009403 |
| 295 | 6 | 0 | -1.084631 | -1.793556 | -10.609469 |
| 296 | 6 | 0 | -2.413835 | -1.764464 | -10.188100 |
| 297 | 1 | 0 | -5.086869 | -1.677284 | -9.089236  |
| 298 | 1 | 0 | -5.109304 | -2.094833 | -6.429618  |
| 299 | 1 | 0 | -1.342977 | -3.285682 | -2.813639  |
| 300 | 1 | 0 | 1.342977  | -3.285682 | -2.813639  |

|     |   |   |           |           |            |
|-----|---|---|-----------|-----------|------------|
| 301 | 1 | 0 | 5.109304  | -2.094833 | -6.429618  |
| 302 | 1 | 0 | 5.086869  | -1.677284 | -9.089236  |
| 303 | 1 | 0 | 3.175099  | -1.643539 | -10.952880 |
| 304 | 1 | 0 | 1.352601  | -1.636295 | -12.853541 |
| 305 | 1 | 0 | -1.352601 | -1.636295 | -12.853541 |
| 306 | 1 | 0 | -3.175099 | -1.643539 | -10.952880 |
| 307 | 1 | 0 | -1.090924 | -2.132283 | -7.765750  |
| 308 | 1 | 0 | 1.090924  | -2.132283 | -7.765750  |
| 309 | 1 | 0 | -1.090924 | 2.132283  | -7.765750  |
| 310 | 1 | 0 | 1.090924  | 2.132283  | -7.765750  |

3. 2DES@Al-TCPPh<sub>2</sub> H---HOAl C<sub>2</sub> symmetry "2DES@Al-TCPPh<sub>2</sub>-S---HOAl" aka al-linker7a  
Standard orientation:

| Center<br>Number | Atomic<br>Number | Atomic<br>Type | Coordinates (Angstroms) |            |           |
|------------------|------------------|----------------|-------------------------|------------|-----------|
|                  |                  |                | X                       | Y          | Z         |
| 1                | 8                | 0              | 6.998292                | -7.100733  | -1.690319 |
| 2                | 8                | 0              | 4.141303                | -7.839354  | 0.539176  |
| 3                | 8                | 0              | 4.435351                | -6.382164  | -1.764332 |
| 4                | 8                | 0              | 2.277013                | -9.631478  | 1.112981  |
| 5                | 8                | 0              | 5.742550                | -5.767380  | 0.480413  |
| 6                | 8                | 0              | 2.733775                | -8.948022  | -1.534115 |
| 7                | 8                | 0              | 6.572303                | -8.494432  | 0.566426  |
| 8                | 8                | 0              | 2.440678                | -6.230318  | -0.731725 |
| 9                | 8                | 0              | 4.982619                | -9.078973  | -1.801431 |
| 10               | 8                | 0              | 1.765835                | -6.992860  | 1.680125  |
| 11               | 1                | 0              | 4.477839                | -8.545284  | 1.113566  |
| 12               | 1                | 0              | 4.592973                | -4.931107  | -3.731647 |
| 13               | 1                | 0              | 3.895906                | -3.084666  | -5.248494 |
| 14               | 1                | 0              | 4.771963                | -3.715738  | 1.457764  |
| 15               | 1                | 0              | 0.247563                | 4.305754   | -3.698273 |
| 16               | 1                | 0              | 0.602885                | -2.182042  | -2.650175 |
| 17               | 1                | 0              | 1.282790                | -4.072380  | -1.163884 |
| 18               | 1                | 0              | 2.598240                | -5.027284  | 2.793786  |
| 19               | 1                | 0              | 4.334791                | 4.877097   | -4.861159 |
| 20               | 13               | 0              | 2.365193                | -7.948112  | 0.112299  |
| 21               | 13               | 0              | 5.618773                | -7.611210  | -0.691805 |
| 22               | 6                | 0              | 3.724340                | -4.323807  | -3.504030 |
| 23               | 6                | 0              | 3.330826                | -3.293055  | -4.345828 |
| 24               | 6                | 0              | 5.449727                | -3.670765  | 2.303454  |
| 25               | 6                | 0              | 1.199753                | 4.798786   | -3.550839 |
| 26               | 6                | 0              | 1.487399                | -2.770079  | -2.877640 |
| 27               | 6                | 0              | 1.865959                | -3.824912  | -2.044789 |
| 28               | 6                | 0              | 1.649722                | -4.695136  | 3.200803  |
| 29               | 6                | 0              | 3.498895                | 5.132982   | -4.216542 |
| 30               | 6                | 0              | 2.974250                | -4.620767  | -2.362166 |
| 31               | 6                | 0              | 2.193609                | -2.515299  | -4.062695 |
| 32               | 6                | 0              | 6.370367                | -4.718987  | 2.483645  |
| 33               | 6                | 0              | 2.277013                | 4.463107   | -4.379783 |
| 34               | 6                | 0              | 3.323107                | -5.828890  | -1.550975 |
| 35               | 6                | 0              | 1.296065                | -10.277155 | 1.568502  |
| 36               | 6                | 0              | 6.374764                | -5.842336  | 1.525067  |
| 37               | 6                | 0              | 3.797483                | -9.397356  | -2.053324 |
| 38               | 8                | 0              | 5.703435                | 9.715774   | -0.604514 |

|    |    |   |           |            |           |
|----|----|---|-----------|------------|-----------|
| 39 | 8  | 0 | 2.489339  | 9.193820   | 1.217183  |
| 40 | 8  | 0 | 3.124631  | 10.885652  | -0.860096 |
| 41 | 8  | 0 | 0.456522  | 7.347813   | 1.896058  |
| 42 | 8  | 0 | 4.561479  | 10.529812  | 1.668078  |
| 43 | 8  | 0 | 1.817882  | 7.220860   | -0.329324 |
| 44 | 8  | 0 | 4.650766  | 7.719620   | 1.152610  |
| 45 | 8  | 0 | 1.085740  | 9.899448   | -1.006157 |
| 46 | 8  | 0 | 3.599928  | 8.231959   | -1.246211 |
| 47 | 8  | 0 | -0.064597 | 10.017027  | 1.481850  |
| 48 | 1  | 0 | 2.486148  | 9.941230   | 1.835289  |
| 49 | 1  | 0 | 1.610131  | 5.658640   | 3.236199  |
| 50 | 1  | 0 | 0.523501  | 5.989167   | -1.881768 |
| 51 | 1  | 0 | 4.033305  | 5.384752   | 1.799154  |
| 52 | 1  | 0 | 4.592571  | 6.610166   | -3.075747 |
| 53 | 13 | 0 | 0.897460  | 8.637199   | 0.511000  |
| 54 | 13 | 0 | 4.118866  | 9.578100   | 0.193523  |
| 55 | 6  | 0 | 0.735899  | 5.053549   | 3.448952  |
| 56 | 6  | 0 | 1.350174  | 5.734913   | -2.537195 |
| 57 | 6  | 0 | 4.602827  | 5.389580   | 2.723020  |
| 58 | 6  | 0 | 3.649034  | 6.092768   | -3.216649 |
| 59 | 6  | 0 | -0.505940 | 5.464846   | 2.948869  |
| 60 | 6  | 0 | 2.584307  | 6.375482   | -2.356420 |
| 61 | 6  | 0 | 1.950840  | 10.780376  | -1.287305 |
| 62 | 6  | 0 | -0.610991 | 6.704277   | 2.106617  |
| 63 | 6  | 0 | 2.699088  | 7.352223   | -1.235053 |
| 64 | 8  | 0 | 0.613801  | -8.125412  | -0.450756 |
| 65 | 8  | 0 | -2.489339 | -9.193820  | 1.217183  |
| 66 | 8  | 0 | -1.817882 | -7.220860  | -0.329324 |
| 67 | 8  | 0 | -4.561479 | -10.529812 | 1.668078  |
| 68 | 8  | 0 | -0.456522 | -7.347813  | 1.896058  |
| 69 | 8  | 0 | -3.124631 | -10.885652 | -0.860096 |
| 70 | 8  | 0 | 0.064597  | -10.017027 | 1.481850  |
| 71 | 8  | 0 | -3.599928 | -8.231959  | -1.246211 |
| 72 | 8  | 0 | -1.085740 | -9.899448  | -1.006157 |
| 73 | 8  | 0 | -4.650766 | -7.719620  | 1.152610  |
| 74 | 1  | 0 | 0.612818  | -8.604933  | -1.292446 |
| 75 | 1  | 0 | -2.486148 | -9.941230  | 1.835289  |
| 76 | 1  | 0 | -0.523501 | -5.989167  | -1.881768 |
| 77 | 1  | 0 | -0.247563 | -4.305754  | -3.698273 |
| 78 | 1  | 0 | -1.610131 | -5.658640  | 3.236199  |
| 79 | 1  | 0 | -3.895906 | 3.084666   | -5.248494 |
| 80 | 1  | 0 | -4.334791 | -4.877097  | -4.861159 |
| 81 | 1  | 0 | -4.592571 | -6.610166  | -3.075747 |
| 82 | 1  | 0 | -4.033305 | -5.384752  | 1.799154  |
| 83 | 1  | 0 | -0.602885 | 2.182042   | -2.650175 |
| 84 | 13 | 0 | -4.118866 | -9.578100  | 0.193523  |
| 85 | 13 | 0 | -0.897460 | -8.637199  | 0.511000  |
| 86 | 6  | 0 | -1.350174 | -5.734913  | -2.537195 |
| 87 | 6  | 0 | -1.199753 | -4.798786  | -3.550839 |
| 88 | 6  | 0 | -0.735899 | -5.053549  | 3.448952  |
| 89 | 6  | 0 | -3.330826 | 3.293055   | -4.345828 |
| 90 | 6  | 0 | -3.498895 | -5.132982  | -4.216542 |
| 91 | 6  | 0 | -3.649034 | -6.092768  | -3.216649 |
| 92 | 6  | 0 | -4.602827 | -5.389580  | 2.723020  |
| 93 | 6  | 0 | -1.487399 | 2.770079   | -2.877640 |
| 94 | 6  | 0 | -2.584307 | -6.375482  | -2.356420 |



|     |    |   |           |            |           |
|-----|----|---|-----------|------------|-----------|
| 95  | 6  | 0 | -2.277013 | -4.463107  | -4.379783 |
| 96  | 6  | 0 | 0.505940  | -5.464846  | 2.948869  |
| 97  | 6  | 0 | -2.193609 | 2.515299   | -4.062695 |
| 98  | 6  | 0 | -2.699088 | -7.352223  | -1.235053 |
| 99  | 6  | 0 | 0.610991  | -6.704277  | 2.106617  |
| 100 | 6  | 0 | -1.950840 | -10.780376 | -1.287305 |
| 101 | 8  | 0 | -0.613801 | 8.125412   | -0.450756 |
| 102 | 8  | 0 | -4.141303 | 7.839354   | 0.539176  |
| 103 | 8  | 0 | -2.733775 | 8.948022   | -1.534115 |
| 104 | 8  | 0 | -5.742550 | 5.767380   | 0.480413  |
| 105 | 8  | 0 | -2.277013 | 9.631478   | 1.112981  |
| 106 | 8  | 0 | -4.435351 | 6.382164   | -1.764332 |
| 107 | 8  | 0 | -1.765835 | 6.992860   | 1.680125  |
| 108 | 8  | 0 | -4.982619 | 9.078973   | -1.801431 |
| 109 | 8  | 0 | -2.440678 | 6.230318   | -0.731725 |
| 110 | 8  | 0 | -6.572303 | 8.494432   | 0.566426  |
| 111 | 1  | 0 | -0.612818 | 8.604933   | -1.292446 |
| 112 | 1  | 0 | -4.477839 | 8.545284   | 1.113566  |
| 113 | 1  | 0 | -4.771963 | 3.715738   | 1.457764  |
| 114 | 1  | 0 | -4.592973 | 4.931107   | -3.731647 |
| 115 | 1  | 0 | -2.598240 | 5.027284   | 2.793786  |
| 116 | 1  | 0 | -1.282790 | 4.072380   | -1.163884 |
| 117 | 13 | 0 | -5.618773 | 7.611210   | -0.691805 |
| 118 | 13 | 0 | -2.365193 | 7.948112   | 0.112299  |
| 119 | 6  | 0 | -5.449727 | 3.670765   | 2.303454  |
| 120 | 6  | 0 | -3.724340 | 4.323807   | -3.504030 |
| 121 | 6  | 0 | -1.649722 | 4.695136   | 3.200803  |
| 122 | 6  | 0 | -1.865959 | 3.824912   | -2.044789 |
| 123 | 6  | 0 | -6.370367 | 4.718987   | 2.483645  |
| 124 | 6  | 0 | -2.974250 | 4.620767   | -2.362166 |
| 125 | 6  | 0 | -3.797483 | 9.397356   | -2.053324 |
| 126 | 6  | 0 | -6.374764 | 5.842336   | 1.525067  |
| 127 | 6  | 0 | -1.296065 | 10.277155  | 1.568502  |
| 128 | 6  | 0 | -3.323107 | 5.828890   | -1.550975 |
| 129 | 8  | 0 | 3.255855  | 0.391283   | 5.911399  |
| 130 | 8  | 0 | 6.653978  | 0.813917   | 7.070318  |
| 131 | 8  | 0 | 0.963696  | 1.488072   | 5.575381  |
| 132 | 8  | 0 | 4.663988  | -0.919758  | 7.774559  |
| 133 | 8  | 0 | 2.052583  | 1.597966   | 8.054437  |
| 134 | 8  | 0 | 5.461081  | -0.600568  | 5.119170  |
| 135 | 8  | 0 | 2.416346  | -1.085628  | 8.030091  |
| 136 | 8  | 0 | 5.073101  | 2.078611   | 5.276103  |
| 137 | 8  | 0 | 1.276690  | -1.288428  | 5.601671  |
| 138 | 8  | 0 | 4.300733  | 1.878897   | 7.936335  |
| 139 | 1  | 0 | 3.122506  | 0.603038   | 4.972957  |
| 140 | 1  | 0 | 1.789553  | 3.549680   | 4.582969  |
| 141 | 1  | 0 | 4.707037  | -1.814778  | 3.112709  |
| 142 | 1  | 0 | 4.284749  | 3.310890   | 3.203857  |
| 143 | 1  | 0 | 2.433633  | -2.931912  | 4.173194  |
| 144 | 13 | 0 | 4.950478  | 0.610784   | 6.626584  |
| 145 | 13 | 0 | 1.640959  | 0.177419   | 6.779426  |
| 146 | 6  | 0 | 0.833308  | 3.886065   | 4.198083  |
| 147 | 6  | 0 | 5.419559  | -2.626341  | 3.206611  |
| 148 | 6  | 0 | 4.744422  | 4.251007   | 3.496554  |
| 149 | 6  | 0 | 1.556363  | -3.532865  | 3.959359  |
| 150 | 6  | 0 | 5.504638  | 4.315553   | 4.683554  |

|     |    |   |           |           |          |
|-----|----|---|-----------|-----------|----------|
| 151 | 6  | 0 | 0.313503  | -3.121509 | 4.461173 |
| 152 | 6  | 0 | 5.651389  | 3.145078  | 5.525506 |
| 153 | 6  | 0 | 3.605518  | -1.439086 | 8.229812 |
| 154 | 6  | 0 | 3.137774  | 2.156172  | 8.348800 |
| 155 | 6  | 0 | 0.205639  | -1.877627 | 5.271891 |
| 156 | 8  | 0 | -3.255855 | -0.391283 | 5.911399 |
| 157 | 8  | 0 | 0.000000  | 0.000000  | 7.622323 |
| 158 | 8  | 0 | -5.461081 | 0.600568  | 5.119170 |
| 159 | 8  | 0 | -2.052583 | -1.597966 | 8.054437 |
| 160 | 8  | 0 | -4.663988 | 0.919758  | 7.774559 |
| 161 | 8  | 0 | -0.963696 | -1.488072 | 5.575381 |
| 162 | 8  | 0 | -4.300733 | -1.878897 | 7.936335 |
| 163 | 8  | 0 | -1.276690 | 1.288428  | 5.601671 |
| 164 | 8  | 0 | -5.073101 | -2.078611 | 5.276103 |
| 165 | 8  | 0 | -2.416346 | 1.085628  | 8.030091 |
| 166 | 1  | 0 | -3.122506 | -0.603038 | 4.972957 |
| 167 | 1  | 0 | 0.000000  | 0.000000  | 8.587070 |
| 168 | 1  | 0 | -4.707037 | 1.814778  | 3.112709 |
| 169 | 1  | 0 | -1.789553 | -3.549680 | 4.582969 |
| 170 | 1  | 0 | -2.433633 | 2.931912  | 4.173194 |
| 171 | 1  | 0 | -4.284749 | -3.310890 | 3.203857 |
| 172 | 13 | 0 | -1.640959 | -0.177419 | 6.779426 |
| 173 | 13 | 0 | -4.950478 | -0.610784 | 6.626584 |
| 174 | 6  | 0 | -5.419559 | 2.626341  | 3.206611 |
| 175 | 6  | 0 | -0.833308 | -3.886065 | 4.198083 |
| 176 | 6  | 0 | -1.556363 | 3.532865  | 3.959359 |
| 177 | 6  | 0 | -4.744422 | -4.251007 | 3.496554 |
| 178 | 6  | 0 | -0.313503 | 3.121509  | 4.461173 |
| 179 | 6  | 0 | -5.504638 | -4.315553 | 4.683554 |
| 180 | 6  | 0 | -0.205639 | 1.877627  | 5.271891 |
| 181 | 6  | 0 | -3.137774 | -2.156172 | 8.348800 |
| 182 | 6  | 0 | -3.605518 | 1.439086  | 8.229812 |
| 183 | 6  | 0 | -5.651389 | -3.145078 | 5.525506 |
| 184 | 6  | 0 | 7.256258  | -4.719033 | 3.566739 |
| 185 | 6  | 0 | 6.325295  | -2.613375 | 4.287049 |
| 186 | 6  | 0 | -5.192097 | -6.596867 | 3.141104 |
| 187 | 6  | 0 | -6.097394 | -5.519567 | 5.096108 |
| 188 | 6  | 0 | 7.242894  | -3.658499 | 4.466366 |
| 189 | 6  | 0 | -5.923203 | -6.666709 | 4.332510 |
| 190 | 1  | 0 | 7.948976  | -5.546189 | 3.691757 |
| 191 | 1  | 0 | 7.928135  | -3.635868 | 5.309351 |
| 192 | 1  | 0 | -6.357072 | -7.613357 | 4.641157 |
| 193 | 1  | 0 | -6.675339 | -5.546789 | 6.015948 |
| 194 | 6  | 0 | 6.269312  | -1.527335 | 5.248789 |
| 195 | 6  | 0 | -5.022486 | -7.808603 | 2.314795 |
| 196 | 1  | 0 | 6.940267  | -1.529149 | 6.117788 |
| 197 | 1  | 0 | -5.200180 | -8.811509 | 2.735305 |
| 198 | 6  | 0 | 6.097394  | 5.519567  | 5.096108 |
| 199 | 6  | 0 | 5.192097  | 6.596867  | 3.141104 |
| 200 | 6  | 0 | -6.325295 | 2.613375  | 4.287049 |
| 201 | 6  | 0 | -7.256258 | 4.719033  | 3.566739 |
| 202 | 1  | 0 | 6.675339  | 5.546789  | 6.015948 |
| 203 | 1  | 0 | -7.948976 | 5.546189  | 3.691757 |
| 204 | 6  | 0 | 5.923203  | 6.666709  | 4.332510 |
| 205 | 6  | 0 | -7.242894 | 3.658499  | 4.466366 |
| 206 | 1  | 0 | -7.928135 | 3.635868  | 5.309351 |

|     |   |   |           |            |            |
|-----|---|---|-----------|------------|------------|
| 207 | 1 | 0 | 6.357072  | 7.613357   | 4.641157   |
| 208 | 6 | 0 | -6.269312 | 1.527335   | 5.248789   |
| 209 | 6 | 0 | 5.022486  | 7.808603   | 2.314795   |
| 210 | 1 | 0 | -6.940267 | 1.529149   | 6.117788   |
| 211 | 1 | 0 | 5.200180  | 8.811509   | 2.735305   |
| 212 | 1 | 0 | 6.283252  | 3.202023   | 6.421218   |
| 213 | 1 | 0 | -6.918368 | 6.774743   | 1.745644   |
| 214 | 1 | 0 | -6.283252 | -3.202023  | 6.421218   |
| 215 | 1 | 0 | 6.918368  | -6.774743  | 1.745644   |
| 216 | 1 | 0 | 1.546995  | -11.194487 | 2.123278   |
| 217 | 1 | 0 | -3.654591 | 10.164011  | -2.831164  |
| 218 | 1 | 0 | 1.625613  | 11.548974  | -2.006692  |
| 219 | 1 | 0 | 3.654591  | -10.164011 | -2.831164  |
| 220 | 1 | 0 | -1.625613 | -11.548974 | -2.006692  |
| 221 | 1 | 0 | 3.745999  | -2.305745  | 8.891768   |
| 222 | 1 | 0 | -3.073367 | -2.990651  | 9.062644   |
| 223 | 1 | 0 | -3.745999 | 2.305745   | 8.891768   |
| 224 | 1 | 0 | 3.073367  | 2.990651   | 9.062644   |
| 225 | 1 | 0 | -1.546995 | 11.194487  | 2.123278   |
| 226 | 8 | 0 | -6.653978 | -0.813917  | 7.070318   |
| 227 | 8 | 0 | -6.998292 | 7.100733   | -1.690319  |
| 228 | 8 | 0 | -5.703435 | -9.715774  | -0.604514  |
| 229 | 1 | 0 | -7.426852 | 8.725577   | 0.176851   |
| 230 | 1 | 0 | 5.344305  | 11.051685  | 1.443228   |
| 231 | 1 | 0 | -5.344305 | -11.051685 | 1.443228   |
| 232 | 1 | 0 | 7.426852  | -8.725577  | 0.176851   |
| 233 | 1 | 0 | 6.796862  | 0.786767   | 8.024420   |
| 234 | 1 | 0 | 5.714178  | 9.268671   | -1.459874  |
| 235 | 1 | 0 | 6.723066  | -6.555142  | -2.437170  |
| 236 | 1 | 0 | -5.714178 | -9.268671  | -1.459874  |
| 237 | 1 | 0 | -6.796862 | -0.786767  | 8.024420   |
| 238 | 1 | 0 | -6.723066 | 6.555142   | -2.437170  |
| 239 | 7 | 0 | 1.464437  | -1.259522  | -7.517217  |
| 240 | 7 | 0 | 1.802799  | 0.920531   | -5.628497  |
| 241 | 7 | 0 | 2.070174  | 2.885514   | -7.807197  |
| 242 | 7 | 0 | 1.765835  | 0.686572   | -9.694101  |
| 243 | 6 | 0 | 1.276346  | -2.086804  | -8.598638  |
| 244 | 6 | 0 | 1.146354  | -3.416398  | -8.082282  |
| 245 | 6 | 0 | 1.316754  | -3.362276  | -6.723218  |
| 246 | 6 | 0 | 1.536456  | -1.989350  | -6.356685  |
| 247 | 6 | 0 | 1.802990  | -1.487307  | -5.072743  |
| 248 | 6 | 0 | 1.872305  | -0.119597  | -4.741566  |
| 249 | 6 | 0 | 2.089348  | 0.371888   | -3.383573  |
| 250 | 6 | 0 | 2.134719  | 1.725789   | -3.469254  |
| 251 | 6 | 0 | 1.979716  | 2.054753   | -4.885733  |
| 252 | 6 | 0 | 2.113492  | 3.368363   | -5.380213  |
| 253 | 6 | 0 | 2.135679  | 3.734836   | -6.730174  |
| 254 | 6 | 0 | 2.232248  | 5.064930   | -7.262496  |
| 255 | 6 | 0 | 2.230915  | 4.974652   | -8.631666  |
| 256 | 6 | 0 | 2.126560  | 3.590298   | -8.985135  |
| 257 | 6 | 0 | 2.086879  | 3.046782   | -10.265094 |
| 258 | 6 | 0 | 1.927723  | 1.699840   | -10.593009 |
| 259 | 6 | 0 | 1.852643  | 1.204000   | -11.963570 |
| 260 | 6 | 0 | 1.619510  | -0.130104  | -11.869066 |
| 261 | 6 | 0 | 1.562272  | -0.434637  | -10.442071 |
| 262 | 6 | 0 | 1.315716  | -1.710456  | -9.936191  |

|     |    |   |           |           |            |
|-----|----|---|-----------|-----------|------------|
| 263 | 1  | 0 | 0.943465  | -4.288327 | -8.687820  |
| 264 | 1  | 0 | 1.279028  | -4.182376 | -6.022863  |
| 265 | 1  | 0 | 2.201919  | -0.242851 | -2.501952  |
| 266 | 1  | 0 | 2.295338  | 2.439985  | -2.674765  |
| 267 | 1  | 0 | 2.292151  | 5.956881  | -6.656983  |
| 268 | 1  | 0 | 2.295531  | 5.782982  | -9.347789  |
| 269 | 1  | 0 | 2.174268  | 3.752991  | -11.085542 |
| 270 | 1  | 0 | 1.954778  | 1.809802  | -12.855734 |
| 271 | 1  | 0 | 1.481006  | -0.849744 | -12.665409 |
| 272 | 1  | 0 | 1.146126  | -2.504829 | -10.655269 |
| 273 | 7  | 0 | -1.464437 | 1.259522  | -7.517217  |
| 274 | 7  | 0 | -1.802799 | -0.920531 | -5.628497  |
| 275 | 7  | 0 | -2.070174 | -2.885514 | -7.807197  |
| 276 | 7  | 0 | -1.765835 | -0.686572 | -9.694101  |
| 277 | 6  | 0 | -1.276346 | 2.086804  | -8.598638  |
| 278 | 6  | 0 | -1.146354 | 3.416398  | -8.082282  |
| 279 | 6  | 0 | -1.316754 | 3.362276  | -6.723218  |
| 280 | 6  | 0 | -1.536456 | 1.989350  | -6.356685  |
| 281 | 6  | 0 | -1.802990 | 1.487307  | -5.072743  |
| 282 | 6  | 0 | -1.872305 | 0.119597  | -4.741566  |
| 283 | 6  | 0 | -2.089348 | -0.371888 | -3.383573  |
| 284 | 6  | 0 | -2.134719 | -1.725789 | -3.469254  |
| 285 | 6  | 0 | -1.979716 | -2.054753 | -4.885733  |
| 286 | 6  | 0 | -2.113492 | -3.368363 | -5.380213  |
| 287 | 6  | 0 | -2.135679 | -3.734836 | -6.730174  |
| 288 | 6  | 0 | -2.232248 | -5.064930 | -7.262496  |
| 289 | 6  | 0 | -2.230915 | -4.974652 | -8.631666  |
| 290 | 6  | 0 | -2.126560 | -3.590298 | -8.985135  |
| 291 | 6  | 0 | -2.086879 | -3.046782 | -10.265094 |
| 292 | 6  | 0 | -1.927723 | -1.699840 | -10.593009 |
| 293 | 6  | 0 | -1.852643 | -1.204000 | -11.963570 |
| 294 | 6  | 0 | -1.619510 | 0.130104  | -11.869066 |
| 295 | 6  | 0 | -1.562272 | 0.434637  | -10.442071 |
| 296 | 6  | 0 | -1.315716 | 1.710456  | -9.936191  |
| 297 | 1  | 0 | -0.943465 | 4.288327  | -8.687820  |
| 298 | 1  | 0 | -1.279028 | 4.182376  | -6.022863  |
| 299 | 1  | 0 | -2.201919 | 0.242851  | -2.501952  |
| 300 | 1  | 0 | -2.295338 | -2.439985 | -2.674765  |
| 301 | 1  | 0 | -2.292151 | -5.956881 | -6.656983  |
| 302 | 1  | 0 | -2.295531 | -5.782982 | -9.347789  |
| 303 | 1  | 0 | -2.174268 | -3.752991 | -11.085542 |
| 304 | 1  | 0 | -1.954778 | -1.809802 | -12.855734 |
| 305 | 1  | 0 | -1.481006 | 0.849744  | -12.665409 |
| 306 | 1  | 0 | -1.146126 | 2.504829  | -10.655269 |
| 307 | 1  | 0 | -1.588284 | 0.253790  | -7.569845  |
| 308 | 1  | 0 | -1.954815 | -1.878959 | -7.747757  |
| 309 | 1  | 0 | 1.954815  | 1.878959  | -7.747757  |
| 310 | 1  | 0 | 1.588284  | -0.253790 | -7.569845  |
| 311 | 16 | 0 | 2.678117  | 1.017913  | 2.364841   |
| 312 | 16 | 0 | -2.678117 | -1.017913 | 2.364841   |
| 313 | 6  | 0 | -1.196051 | -1.630096 | 1.460918   |
| 314 | 1  | 0 | -0.754995 | -0.781650 | 0.930115   |
| 315 | 1  | 0 | -0.487922 | -1.925449 | 2.236987   |
| 316 | 6  | 0 | 1.196051  | 1.630096  | 1.460918   |
| 317 | 1  | 0 | 0.754995  | 0.781650  | 0.930115   |
| 318 | 1  | 0 | 0.487922  | 1.925449  | 2.236987   |

|     |   |   |           |           |           |
|-----|---|---|-----------|-----------|-----------|
| 319 | 6 | 0 | -3.483047 | -0.005332 | 1.056347  |
| 320 | 1 | 0 | -3.605762 | -0.624720 | 0.161872  |
| 321 | 1 | 0 | -4.488299 | 0.196211  | 1.440282  |
| 322 | 6 | 0 | 3.483047  | 0.005332  | 1.056347  |
| 323 | 1 | 0 | 3.605762  | 0.624720  | 0.161872  |
| 324 | 1 | 0 | 4.488299  | -0.196211 | 1.440282  |
| 325 | 6 | 0 | -2.754613 | 1.296738  | 0.725128  |
| 326 | 1 | 0 | -3.308197 | 1.864773  | -0.032090 |
| 327 | 1 | 0 | -2.630008 | 1.924700  | 1.613403  |
| 328 | 1 | 0 | -1.757200 | 1.107492  | 0.315439  |
| 329 | 6 | 0 | 2.754613  | -1.296738 | 0.725128  |
| 330 | 1 | 0 | 1.757200  | -1.107492 | 0.315439  |
| 331 | 1 | 0 | 3.308197  | -1.864773 | -0.032090 |
| 332 | 1 | 0 | 2.630008  | -1.924700 | 1.613403  |
| 333 | 6 | 0 | -1.477379 | -2.791812 | 0.511993  |
| 334 | 1 | 0 | -1.838568 | -3.669112 | 1.055601  |
| 335 | 1 | 0 | -2.220577 | -2.526239 | -0.246928 |
| 336 | 1 | 0 | -0.557847 | -3.080965 | -0.010912 |
| 337 | 6 | 0 | 1.477379  | 2.791812  | 0.511993  |
| 338 | 1 | 0 | 1.838568  | 3.669112  | 1.055601  |
| 339 | 1 | 0 | 2.220577  | 2.526239  | -0.246928 |
| 340 | 1 | 0 | 0.557847  | 3.080965  | -0.010912 |

Model#2 distal pyrrole rings fixed at 6.0 Å separation

4. Al-TCPPh<sub>2</sub> C<sub>s</sub> symmetry "Al-TCPPh<sub>2</sub> sandwich-fix" aka al-linker5aa-fix

Standard orientation:

| Center<br>Number | Atomic<br>Number | Atomic<br>Type | Coordinates (Angstroms) |            |          |
|------------------|------------------|----------------|-------------------------|------------|----------|
|                  |                  |                | X                       | Y          | Z        |
| 1                | 8                | 0              | 0.823145                | -8.605457  | 6.577152 |
| 2                | 8                | 0              | -1.024349               | -8.405760  | 3.382696 |
| 3                | 8                | 0              | 1.355523                | -7.378114  | 4.285904 |
| 4                | 8                | 0              | -1.543928               | -9.682543  | 1.136589 |
| 5                | 8                | 0              | -1.029171               | -6.740683  | 5.404791 |
| 6                | 8                | 0              | 1.068829                | -9.517344  | 1.993966 |
| 7                | 8                | 0              | -1.466968               | -9.564802  | 5.574607 |
| 8                | 8                | 0              | 0.684869                | -6.740889  | 2.232824 |
| 9                | 8                | 0              | 1.025595                | -10.111379 | 4.183596 |
| 10               | 8                | 0              | -1.728990               | -6.936747  | 1.131638 |
| 11               | 1                | 0              | -1.716178               | -9.078403  | 3.486107 |
| 12               | 1                | 0              | 3.166473                | -5.953581  | 5.211040 |
| 13               | 1                | 0              | 4.899727                | -4.157320  | 5.128864 |
| 14               | 1                | 0              | -1.838762               | -4.535041  | 4.616815 |
| 15               | 1                | 0              | 3.636975                | 3.101580   | 1.171764 |
| 16               | 1                | 0              | 3.600693                | -3.092710  | 1.182290 |
| 17               | 1                | 0              | 1.883902                | -4.908648  | 1.267461 |
| 18               | 1                | 0              | -3.038492               | -5.150334  | 2.138710 |
| 19               | 1                | 0              | 4.894134                | 4.110574   | 5.146244 |
| 20               | 13               | 0              | -0.370446               | -8.215787  | 1.680236 |
| 21               | 13               | 0              | 0.002138                | -8.674029  | 5.002064 |
| 22               | 6                | 0              | 3.272924                | -5.323635  | 4.334816 |
| 23               | 6                | 0              | 4.237404                | -4.321547  | 4.284166 |
| 24               | 6                | 0              | -2.747540               | -4.536889  | 5.209314 |
| 25               | 6                | 0              | 3.531225                | 3.717441   | 2.059649 |

|    |    |   |           |            |           |
|----|----|---|-----------|------------|-----------|
| 26 | 6  | 0 | 3.500918  | -3.717397  | 2.064697  |
| 27 | 6  | 0 | 2.542141  | -4.723843  | 2.108964  |
| 28 | 6  | 0 | -3.363030 | -4.692658  | 1.210757  |
| 29 | 6  | 0 | 4.243416  | 4.289373   | 4.295458  |
| 30 | 6  | 0 | 2.422973  | -5.535204  | 3.244712  |
| 31 | 6  | 0 | 4.366346  | -3.507440  | 3.148309  |
| 32 | 6  | 0 | -3.052931 | -5.684717  | 5.962427  |
| 33 | 6  | 0 | 4.381100  | 3.488502   | 3.151490  |
| 34 | 6  | 0 | 1.409756  | -6.633903  | 3.269378  |
| 35 | 6  | 0 | -1.862457 | -10.123230 | 0.000000  |
| 36 | 6  | 0 | -2.143948 | -6.850192  | 5.894109  |
| 37 | 6  | 0 | 1.389738  | -10.228654 | 2.989909  |
| 38 | 8  | 0 | 0.788289  | 8.522428   | 6.612167  |
| 39 | 8  | 0 | -0.972901 | 8.424636   | 3.376105  |
| 40 | 8  | 0 | 1.069705  | 10.087785  | 4.254544  |
| 41 | 8  | 0 | -1.645203 | 7.004388   | 1.130388  |
| 42 | 8  | 0 | -1.466157 | 9.523684   | 5.581128  |
| 43 | 8  | 0 | 0.771187  | 6.794339   | 2.210529  |
| 44 | 8  | 0 | -1.056638 | 6.667440   | 5.359435  |
| 45 | 8  | 0 | 1.134923  | 9.571581   | 2.044086  |
| 46 | 8  | 0 | 1.366313  | 7.348242   | 4.310532  |
| 47 | 8  | 0 | -1.461468 | 9.746109   | 1.137359  |
| 48 | 1  | 0 | -1.673853 | 9.087236   | 3.481207  |
| 49 | 1  | 0 | -2.994637 | 5.256609   | 2.139230  |
| 50 | 1  | 0 | 1.936746  | 4.933649   | 1.254224  |
| 51 | 1  | 0 | -1.808513 | 4.373603   | 4.719649  |
| 52 | 1  | 0 | 3.171699  | 5.917472   | 5.228315  |
| 53 | 13 | 0 | -0.290834 | 8.274347   | 1.680228  |
| 54 | 13 | 0 | 0.012482  | 8.643923   | 5.018239  |
| 55 | 6  | 0 | -3.336862 | 4.809953   | 1.212220  |
| 56 | 6  | 0 | 2.581350  | 4.732524   | 2.102491  |
| 57 | 6  | 0 | -2.753250 | 4.421318   | 5.250836  |
| 58 | 6  | 0 | 3.285407  | 5.297745   | 4.345786  |
| 59 | 6  | 0 | -2.913028 | 5.369926   | 0.000000  |
| 60 | 6  | 0 | 2.453554  | 5.531049   | 3.246207  |
| 61 | 6  | 0 | 1.447257  | 10.244513  | 3.069448  |
| 62 | 6  | 0 | -1.989778 | 6.556319   | 0.000000  |
| 63 | 6  | 0 | 1.451795  | 6.640833   | 3.270034  |
| 64 | 8  | 0 | 0.401914  | -8.106527  | 0.000000  |
| 65 | 8  | 0 | -1.024349 | -8.405760  | -3.382696 |
| 66 | 8  | 0 | 0.684869  | -6.740889  | -2.232824 |
| 67 | 8  | 0 | -1.466968 | -9.564802  | -5.574607 |
| 68 | 8  | 0 | -1.728990 | -6.936747  | -1.131638 |
| 69 | 8  | 0 | 1.025595  | -10.111379 | -4.183596 |
| 70 | 8  | 0 | -1.543928 | -9.682543  | -1.136589 |
| 71 | 8  | 0 | 1.355523  | -7.378114  | -4.285904 |
| 72 | 8  | 0 | 1.068829  | -9.517344  | -1.993966 |
| 73 | 8  | 0 | -1.029171 | -6.740683  | -5.404791 |
| 74 | 1  | 0 | 1.218266  | -8.627638  | 0.000000  |
| 75 | 1  | 0 | -1.716178 | -9.078403  | -3.486107 |
| 76 | 1  | 0 | 1.883902  | -4.908648  | -1.267461 |
| 77 | 1  | 0 | 3.600693  | -3.092710  | -1.182290 |
| 78 | 1  | 0 | -3.038492 | -5.150334  | -2.138710 |
| 79 | 1  | 0 | 4.894134  | 4.110574   | -5.146244 |
| 80 | 1  | 0 | 4.899727  | -4.157320  | -5.128864 |
| 81 | 1  | 0 | 3.166473  | -5.953581  | -5.211040 |

|     |    |   |           |            |           |
|-----|----|---|-----------|------------|-----------|
| 82  | 1  | 0 | -1.838762 | -4.535041  | -4.616815 |
| 83  | 1  | 0 | 3.636975  | 3.101580   | -1.171764 |
| 84  | 13 | 0 | 0.002138  | -8.674029  | -5.002064 |
| 85  | 13 | 0 | -0.370446 | -8.215787  | -1.680236 |
| 86  | 6  | 0 | 2.542141  | -4.723843  | -2.108964 |
| 87  | 6  | 0 | 3.500918  | -3.717397  | -2.064697 |
| 88  | 6  | 0 | -3.363030 | -4.692658  | -1.210757 |
| 89  | 6  | 0 | 4.243416  | 4.289373   | -4.295458 |
| 90  | 6  | 0 | 4.237404  | -4.321547  | -4.284166 |
| 91  | 6  | 0 | 3.272924  | -5.323635  | -4.334816 |
| 92  | 6  | 0 | -2.747540 | -4.536889  | -5.209314 |
| 93  | 6  | 0 | 3.531225  | 3.717441   | -2.059649 |
| 94  | 6  | 0 | 2.422973  | -5.535204  | -3.244712 |
| 95  | 6  | 0 | 4.366346  | -3.507440  | -3.148309 |
| 96  | 6  | 0 | -2.953815 | -5.266974  | 0.000000  |
| 97  | 6  | 0 | 4.381100  | 3.488502   | -3.151490 |
| 98  | 6  | 0 | 1.409756  | -6.633903  | -3.269378 |
| 99  | 6  | 0 | -2.061333 | -6.480836  | 0.000000  |
| 100 | 6  | 0 | 1.389738  | -10.228654 | -2.989909 |
| 101 | 8  | 0 | 0.488937  | 8.196908   | 0.000000  |
| 102 | 8  | 0 | -0.972901 | 8.424636   | -3.376105 |
| 103 | 8  | 0 | 1.134923  | 9.571581   | -2.044086 |
| 104 | 8  | 0 | -1.056638 | 6.667440   | -5.359435 |
| 105 | 8  | 0 | -1.461468 | 9.746109   | -1.137359 |
| 106 | 8  | 0 | 1.366313  | 7.348242   | -4.310532 |
| 107 | 8  | 0 | -1.645203 | 7.004388   | -1.130388 |
| 108 | 8  | 0 | 1.069705  | 10.087785  | -4.254544 |
| 109 | 8  | 0 | 0.771187  | 6.794339   | -2.210529 |
| 110 | 8  | 0 | -1.466157 | 9.523684   | -5.581128 |
| 111 | 1  | 0 | 1.303381  | 8.720339   | 0.000000  |
| 112 | 1  | 0 | -1.673853 | 9.087236   | -3.481207 |
| 113 | 1  | 0 | -1.808513 | 4.373603   | -4.719649 |
| 114 | 1  | 0 | 3.171699  | 5.917472   | -5.228315 |
| 115 | 1  | 0 | -2.994637 | 5.256609   | -2.139230 |
| 116 | 1  | 0 | 1.936746  | 4.933649   | -1.254224 |
| 117 | 13 | 0 | 0.012482  | 8.643923   | -5.018239 |
| 118 | 13 | 0 | -0.290834 | 8.274347   | -1.680228 |
| 119 | 6  | 0 | -2.753250 | 4.421318   | -5.250836 |
| 120 | 6  | 0 | 3.285407  | 5.297745   | -4.345786 |
| 121 | 6  | 0 | -3.336862 | 4.809953   | -1.212220 |
| 122 | 6  | 0 | 2.581350  | 4.732524   | -2.102491 |
| 123 | 6  | 0 | -3.105240 | 5.627546   | -5.882323 |
| 124 | 6  | 0 | 2.453554  | 5.531049   | -3.246207 |
| 125 | 6  | 0 | 1.447257  | 10.244513  | -3.069448 |
| 126 | 6  | 0 | -2.193540 | 6.791304   | -5.790580 |
| 127 | 6  | 0 | -1.778346 | 10.186935  | 0.000000  |
| 128 | 6  | 0 | 1.451795  | 6.640833   | -3.270034 |
| 129 | 8  | 0 | -6.218025 | 0.045335   | 3.301408  |
| 130 | 8  | 0 | -7.457112 | -0.134538  | 6.701521  |
| 131 | 8  | 0 | -5.856908 | 1.484127   | 1.123785  |
| 132 | 8  | 0 | -8.212296 | -1.422948  | 4.424271  |
| 133 | 8  | 0 | -8.283523 | 1.431098   | 2.282381  |
| 134 | 8  | 0 | -5.555085 | -1.423088  | 5.268650  |
| 135 | 8  | 0 | -8.313178 | -1.295770  | 2.160589  |
| 136 | 8  | 0 | -5.539557 | 1.284751   | 5.437712  |
| 137 | 8  | 0 | -5.792264 | -1.289835  | 1.126152  |

|     |    |   |           |           |           |
|-----|----|---|-----------|-----------|-----------|
| 138 | 8  | 0 | -8.170005 | 1.404173  | 4.545716  |
| 139 | 1  | 0 | -5.323862 | -0.317764 | 3.248694  |
| 140 | 1  | 0 | -4.513195 | 3.259928  | 2.145025  |
| 141 | 1  | 0 | -3.408599 | -2.565640 | 4.645258  |
| 142 | 1  | 0 | -3.379270 | 2.404178  | 4.813872  |
| 143 | 1  | 0 | -4.493651 | -3.111731 | 2.144770  |
| 144 | 13 | 0 | -6.982162 | -0.034984 | 5.000763  |
| 145 | 13 | 0 | -7.037901 | 0.095181  | 1.641739  |
| 146 | 6  | 0 | -4.177419 | 3.702346  | 1.213338  |
| 147 | 6  | 0 | -3.610303 | -3.457927 | 5.227583  |
| 148 | 6  | 0 | -3.614119 | 3.340918  | 5.307268  |
| 149 | 6  | 0 | -4.168499 | -3.558435 | 1.211319  |
| 150 | 6  | 0 | -4.828519 | 3.453156  | 6.015570  |
| 151 | 6  | 0 | -4.576781 | -2.979423 | 0.000000  |
| 152 | 6  | 0 | -5.762704 | 2.343014  | 6.040067  |
| 153 | 6  | 0 | -8.608634 | -1.785228 | 3.281144  |
| 154 | 6  | 0 | -8.563965 | 1.852266  | 3.428963  |
| 155 | 6  | 0 | -5.447388 | -1.769394 | 0.000000  |
| 156 | 8  | 0 | -6.218025 | 0.045335  | -3.301408 |
| 157 | 8  | 0 | -7.893912 | 0.086143  | 0.000000  |
| 158 | 8  | 0 | -5.539557 | 1.284751  | -5.437712 |
| 159 | 8  | 0 | -8.313178 | -1.295770 | -2.160589 |
| 160 | 8  | 0 | -8.170005 | 1.404173  | -4.545716 |
| 161 | 8  | 0 | -5.792264 | -1.289835 | -1.126152 |
| 162 | 8  | 0 | -8.212296 | -1.422948 | -4.424271 |
| 163 | 8  | 0 | -5.856908 | 1.484127  | -1.123785 |
| 164 | 8  | 0 | -5.555085 | -1.423088 | -5.268650 |
| 165 | 8  | 0 | -8.283523 | 1.431098  | -2.282381 |
| 166 | 1  | 0 | -5.323862 | -0.317764 | -3.248694 |
| 167 | 1  | 0 | -8.691862 | -0.460689 | 0.000000  |
| 168 | 1  | 0 | -3.379270 | 2.404178  | -4.813872 |
| 169 | 1  | 0 | -4.493651 | -3.111731 | -2.144770 |
| 170 | 1  | 0 | -4.513195 | 3.259928  | -2.145025 |
| 171 | 1  | 0 | -3.408599 | -2.565640 | -4.645258 |
| 172 | 13 | 0 | -7.037901 | 0.095181  | -1.641739 |
| 173 | 13 | 0 | -6.982162 | -0.034984 | -5.000763 |
| 174 | 6  | 0 | -3.614119 | 3.340918  | -5.307268 |
| 175 | 6  | 0 | -4.168499 | -3.558435 | -1.211319 |
| 176 | 6  | 0 | -4.177419 | 3.702346  | -1.213338 |
| 177 | 6  | 0 | -3.610303 | -3.457927 | -5.227583 |
| 178 | 6  | 0 | -4.603195 | 3.141219  | 0.000000  |
| 179 | 6  | 0 | -4.774980 | -3.509459 | -6.021334 |
| 180 | 6  | 0 | -5.503586 | 1.958180  | 0.000000  |
| 181 | 6  | 0 | -8.608634 | -1.785228 | -3.281144 |
| 182 | 6  | 0 | -8.563965 | 1.852266  | -3.428963 |
| 183 | 6  | 0 | -5.705448 | -2.398705 | -6.019279 |
| 184 | 6  | 0 | -4.214620 | -5.745083 | 6.740210  |
| 185 | 6  | 0 | -4.774980 | -3.509459 | 6.021334  |
| 186 | 6  | 0 | -3.052931 | -5.684717 | -5.962427 |
| 187 | 6  | 0 | -5.069184 | -4.649444 | -6.785990 |
| 188 | 6  | 0 | -5.069184 | -4.649444 | 6.785990  |
| 189 | 6  | 0 | -4.214620 | -5.745083 | -6.740210 |
| 190 | 1  | 0 | -4.434810 | -6.646267 | 7.305027  |
| 191 | 1  | 0 | -5.970514 | -4.672741 | 7.392380  |
| 192 | 1  | 0 | -4.434810 | -6.646267 | -7.305027 |
| 193 | 1  | 0 | -5.970514 | -4.672741 | -7.392380 |



|     |   |   |           |            |           |
|-----|---|---|-----------|------------|-----------|
| 194 | 6 | 0 | -5.705448 | -2.398705  | 6.019279  |
| 195 | 6 | 0 | -2.143948 | -6.850192  | -5.894109 |
| 196 | 1 | 0 | -6.576054 | -2.411932  | 6.686933  |
| 197 | 1 | 0 | -2.476635 | -7.843349  | -6.235958 |
| 198 | 6 | 0 | -5.174603 | 4.655219   | 6.652670  |
| 199 | 6 | 0 | -3.105240 | 5.627546   | 5.882323  |
| 200 | 6 | 0 | -4.828519 | 3.453156   | -6.015570 |
| 201 | 6 | 0 | -4.316458 | 5.746164   | -6.573607 |
| 202 | 1 | 0 | -6.116375 | 4.727999   | 7.190003  |
| 203 | 1 | 0 | -4.572987 | 6.690668   | -7.044649 |
| 204 | 6 | 0 | -4.316458 | 5.746164   | 6.573607  |
| 205 | 6 | 0 | -5.174603 | 4.655219   | -6.652670 |
| 206 | 1 | 0 | -6.116375 | 4.727999   | -7.190003 |
| 207 | 1 | 0 | -4.572987 | 6.690668   | 7.044649  |
| 208 | 6 | 0 | -5.762704 | 2.343014   | -6.040067 |
| 209 | 6 | 0 | -2.193540 | 6.791304   | 5.790580  |
| 210 | 1 | 0 | -6.707447 | 2.454515   | -6.588170 |
| 211 | 1 | 0 | -2.541275 | 7.796299   | 6.081749  |
| 212 | 1 | 0 | -6.707447 | 2.454515   | 6.588170  |
| 213 | 1 | 0 | -2.541275 | 7.796299   | -6.081749 |
| 214 | 1 | 0 | -6.576054 | -2.411932  | -6.686933 |
| 215 | 1 | 0 | -2.476635 | -7.843349  | 6.235958  |
| 216 | 1 | 0 | -2.513093 | -11.011574 | 0.000000  |
| 217 | 1 | 0 | 2.149203  | 11.074655  | -2.891129 |
| 218 | 1 | 0 | 2.149203  | 11.074655  | 2.891129  |
| 219 | 1 | 0 | 2.085052  | -11.055454 | 2.774253  |
| 220 | 1 | 0 | 2.085052  | -11.055454 | -2.774253 |
| 221 | 1 | 0 | -9.306357 | -2.635240  | 3.265409  |
| 222 | 1 | 0 | -9.306357 | -2.635240  | -3.265409 |
| 223 | 1 | 0 | -9.243775 | 2.714786   | -3.476173 |
| 224 | 1 | 0 | -9.243775 | 2.714786   | 3.476173  |
| 225 | 1 | 0 | -2.426758 | 11.077031  | 0.000000  |
| 226 | 8 | 0 | -7.457112 | -0.134538  | -6.701521 |
| 227 | 8 | 0 | 0.788289  | 8.522428   | -6.612167 |
| 228 | 8 | 0 | 0.823145  | -8.605457  | -6.577152 |
| 229 | 1 | 0 | -1.250807 | 9.932617   | -6.430890 |
| 230 | 1 | 0 | -1.250807 | 9.932617   | 6.430890  |
| 231 | 1 | 0 | -1.221661 | -10.030179 | -6.386315 |
| 232 | 1 | 0 | -1.221661 | -10.030179 | 6.386315  |
| 233 | 1 | 0 | -8.412028 | -0.208185  | 6.821103  |
| 234 | 1 | 0 | 1.616388  | 8.028622   | 6.570936  |
| 235 | 1 | 0 | 1.669161  | -8.144405  | 6.522226  |
| 236 | 1 | 0 | 1.669161  | -8.144405  | -6.522226 |
| 237 | 1 | 0 | -8.412028 | -0.208185  | -6.821103 |
| 238 | 1 | 0 | 1.616388  | 8.028622   | -6.570936 |
| 239 | 7 | 0 | 7.873615  | -2.121460  | 3.040963  |
| 240 | 7 | 0 | 5.852193  | -0.012875  | 3.026855  |
| 241 | 7 | 0 | 7.883216  | 2.090132   | 3.041685  |
| 242 | 7 | 0 | 9.915855  | -0.018519  | 2.999995  |
| 243 | 6 | 0 | 9.006667  | -2.897703  | 3.002808  |
| 244 | 6 | 0 | 8.570490  | -4.261923  | 2.987237  |
| 245 | 6 | 0 | 7.199608  | -4.271334  | 3.015567  |
| 246 | 6 | 0 | 6.747100  | -2.908056  | 3.055941  |
| 247 | 6 | 0 | 5.421882  | -2.453022  | 3.089002  |
| 248 | 6 | 0 | 5.023670  | -1.100639  | 3.081225  |
| 249 | 6 | 0 | 3.626413  | -0.685265  | 3.179778  |

|     |   |   |           |           |           |
|-----|---|---|-----------|-----------|-----------|
| 250 | 6 | 0 | 3.629650  | 0.670307  | 3.179896  |
| 251 | 6 | 0 | 5.028778  | 1.078861  | 3.082151  |
| 252 | 6 | 0 | 5.432352  | 2.429308  | 3.091560  |
| 253 | 6 | 0 | 6.758975  | 2.879816  | 3.059176  |
| 254 | 6 | 0 | 7.215138  | 4.241982  | 3.022809  |
| 255 | 6 | 0 | 8.585976  | 4.228912  | 2.993618  |
| 256 | 6 | 0 | 9.018328  | 2.863399  | 3.005278  |
| 257 | 6 | 0 | 10.328998 | 2.396665  | 2.992597  |
| 258 | 6 | 0 | 10.744045 | 1.064414  | 2.999994  |
| 259 | 6 | 0 | 12.146085 | 0.655252  | 2.999994  |
| 260 | 6 | 0 | 12.143174 | -0.701760 | 2.999994  |
| 261 | 6 | 0 | 10.739366 | -1.104915 | 2.999995  |
| 262 | 6 | 0 | 10.318924 | -2.435463 | 2.991364  |
| 263 | 1 | 0 | 9.236652  | -5.113436 | 2.952246  |
| 264 | 1 | 0 | 6.544527  | -5.129140 | 3.003112  |
| 265 | 1 | 0 | 2.778117  | -1.349896 | 3.254785  |
| 266 | 1 | 0 | 2.784793  | 1.339403  | 3.254596  |
| 267 | 1 | 0 | 6.562101  | 5.101412  | 3.013804  |
| 268 | 1 | 0 | 9.254444  | 5.078706  | 2.960991  |
| 269 | 1 | 0 | 11.103004 | 3.158148  | 2.977141  |
| 270 | 1 | 0 | 12.994479 | 1.328538  | 2.997372  |
| 271 | 1 | 0 | 12.988673 | -1.378683 | 2.997375  |
| 272 | 1 | 0 | 11.090052 | -3.199856 | 2.975146  |
| 273 | 7 | 0 | 7.883216  | 2.090132  | -3.041685 |
| 274 | 7 | 0 | 5.852193  | -0.012875 | -3.026855 |
| 275 | 7 | 0 | 7.873615  | -2.121460 | -3.040963 |
| 276 | 7 | 0 | 9.915855  | -0.018519 | -2.999995 |
| 277 | 6 | 0 | 9.018328  | 2.863399  | -3.005278 |
| 278 | 6 | 0 | 8.585976  | 4.228912  | -2.993618 |
| 279 | 6 | 0 | 7.215138  | 4.241982  | -3.022809 |
| 280 | 6 | 0 | 6.758975  | 2.879816  | -3.059176 |
| 281 | 6 | 0 | 5.432352  | 2.429308  | -3.091560 |
| 282 | 6 | 0 | 5.028778  | 1.078861  | -3.082151 |
| 283 | 6 | 0 | 3.629650  | 0.670307  | -3.179896 |
| 284 | 6 | 0 | 3.626413  | -0.685265 | -3.179778 |
| 285 | 6 | 0 | 5.023670  | -1.100639 | -3.081225 |
| 286 | 6 | 0 | 5.421882  | -2.453022 | -3.089002 |
| 287 | 6 | 0 | 6.747100  | -2.908056 | -3.055941 |
| 288 | 6 | 0 | 7.199608  | -4.271334 | -3.015567 |
| 289 | 6 | 0 | 8.570490  | -4.261923 | -2.987237 |
| 290 | 6 | 0 | 9.006667  | -2.897703 | -3.002808 |
| 291 | 6 | 0 | 10.318924 | -2.435463 | -2.991364 |
| 292 | 6 | 0 | 10.739366 | -1.104915 | -2.999995 |
| 293 | 6 | 0 | 12.143174 | -0.701760 | -2.999994 |
| 294 | 6 | 0 | 12.146085 | 0.655252  | -2.999994 |
| 295 | 6 | 0 | 10.744045 | 1.064414  | -2.999994 |
| 296 | 6 | 0 | 10.328998 | 2.396665  | -2.992597 |
| 297 | 1 | 0 | 9.254444  | 5.078706  | -2.960991 |
| 298 | 1 | 0 | 6.562101  | 5.101412  | -3.013804 |
| 299 | 1 | 0 | 2.784793  | 1.339403  | -3.254596 |
| 300 | 1 | 0 | 2.778117  | -1.349896 | -3.254785 |
| 301 | 1 | 0 | 6.544527  | -5.129140 | -3.003112 |
| 302 | 1 | 0 | 9.236652  | -5.113436 | -2.952246 |
| 303 | 1 | 0 | 11.090052 | -3.199856 | -2.975146 |
| 304 | 1 | 0 | 12.988673 | -1.378683 | -2.997375 |
| 305 | 1 | 0 | 12.994479 | 1.328538  | -2.997372 |

|     |   |   |           |           |           |
|-----|---|---|-----------|-----------|-----------|
| 306 | 1 | 0 | 11.103004 | 3.158148  | -2.977141 |
| 307 | 1 | 0 | 7.875238  | 1.074948  | -3.032882 |
| 308 | 1 | 0 | 7.867180  | -1.106323 | -3.034445 |
| 309 | 1 | 0 | 7.875238  | 1.074948  | 3.032882  |
| 310 | 1 | 0 | 7.867180  | -1.106323 | 3.034445  |

5. DES@Al-TCPPH<sub>2</sub> sandwich C<sub>s</sub> symmetry "DES@Al-TCPPH<sub>2</sub> sandwich-fix" aka al-linker7bb-fix2x  
Standard orientation:

| Center<br>Number | Atomic<br>Number | Atomic<br>Type | Coordinates (Angstroms) |            |          |
|------------------|------------------|----------------|-------------------------|------------|----------|
|                  |                  |                | X                       | Y          | Z        |
| 1                | 8                | 0              | -1.314073               | 8.668629   | 6.583648 |
| 2                | 8                | 0              | 0.513090                | 8.556093   | 3.375970 |
| 3                | 8                | 0              | -1.764418               | 7.369027   | 4.313278 |
| 4                | 8                | 0              | 0.903399                | 9.860663   | 1.135719 |
| 5                | 8                | 0              | 0.661783                | 6.928642   | 5.420537 |
| 6                | 8                | 0              | -1.680766               | 9.478476   | 1.994176 |
| 7                | 8                | 0              | 0.892793                | 9.778274   | 5.546966 |
| 8                | 8                | 0              | -1.068767               | 6.748450   | 2.262491 |
| 9                | 8                | 0              | -1.648248               | 10.118525  | 4.171232 |
| 10               | 8                | 0              | 1.312924                | 7.135228   | 1.131729 |
| 11               | 1                | 0              | 1.155055                | 9.279060   | 3.459028 |
| 12               | 1                | 0              | -3.461791               | 5.848692   | 5.279367 |
| 13               | 1                | 0              | -5.010321               | 3.889004   | 5.283227 |
| 14               | 1                | 0              | 1.615699                | 4.777803   | 4.638412 |
| 15               | 1                | 0              | -3.388204               | -3.434792  | 1.442854 |
| 16               | 1                | 0              | -3.518972               | 2.715867   | 1.436052 |
| 17               | 1                | 0              | -2.005669               | 4.702511   | 1.424883 |
| 18               | 1                | 0              | 2.759340                | 5.459628   | 2.138768 |
| 19               | 1                | 0              | -4.054961               | -4.380174  | 5.572587 |
| 20               | 13               | 0              | -0.142646               | 8.300323   | 1.681586 |
| 21               | 13               | 0              | -0.511437               | 8.774600   | 5.001153 |
| 22               | 6                | 0              | -3.487407               | 5.159170   | 4.442902 |
| 23               | 6                | 0              | -4.347263               | 4.064525   | 4.441269 |
| 24               | 6                | 0              | 2.529321                | 4.849440   | 5.219033 |
| 25               | 6                | 0              | -3.114168               | -4.004130  | 2.326055 |
| 26               | 6                | 0              | -3.505070               | 3.401266   | 2.276837 |
| 27               | 6                | 0              | -2.656510               | 4.503217   | 2.269081 |
| 28               | 6                | 0              | 3.119279                | 5.028949   | 1.210954 |
| 29               | 6                | 0              | -3.501704               | -4.543382  | 4.652175 |
| 30               | 6                | 0              | -2.644929               | 5.392195   | 3.351068 |
| 31               | 6                | 0              | -4.371866               | 3.175128   | 3.356406 |
| 32               | 6                | 0              | 2.763060                | 6.023921   | 5.956700 |
| 33               | 6                | 0              | -3.834422               | -3.799002  | 3.512376 |
| 34               | 6                | 0              | -1.756551               | 6.594056   | 3.318728 |
| 35               | 6                | 0              | 1.184759                | 10.327050  | 0.000000 |
| 36               | 6                | 0              | 1.773814                | 7.122321   | 5.889333 |
| 37               | 6                | 0              | -2.040633               | 10.182082  | 2.982571 |
| 38               | 8                | 0              | 0.239961                | -8.605342  | 6.642388 |
| 39               | 8                | 0              | 1.881604                | -8.261156  | 3.361302 |
| 40               | 8                | 0              | 0.050998                | -10.140527 | 4.264266 |
| 41               | 8                | 0              | 2.340077                | -6.766777  | 1.130396 |
| 42               | 8                | 0              | 2.555666                | -9.358696  | 5.530054 |
| 43               | 8                | 0              | -0.080497               | -6.837901  | 2.249150 |

|    |    |   |           |            |           |
|----|----|---|-----------|------------|-----------|
| 44 | 8  | 0 | 1.856275  | -6.588965  | 5.389469  |
| 45 | 8  | 0 | -0.124412 | -9.624395  | 2.058841  |
| 46 | 8  | 0 | -0.499067 | -7.441388  | 4.379546  |
| 47 | 8  | 0 | 2.462953  | -9.517636  | 1.136038  |
| 48 | 1  | 0 | 2.651888  | -8.847524  | 3.426814  |
| 49 | 1  | 0 | 3.540263  | -4.915680  | 2.138941  |
| 50 | 1  | 0 | -1.541128 | -5.130322  | 1.362054  |
| 51 | 1  | 0 | 2.364508  | -4.232702  | 4.736755  |
| 52 | 1  | 0 | -2.212422 | -6.068296  | 5.480672  |
| 53 | 13 | 0 | 1.138947  | -8.180179  | 1.683399  |
| 54 | 13 | 0 | 0.986333  | -8.606984  | 5.027964  |
| 55 | 6  | 0 | 3.844901  | -4.441825  | 1.212329  |
| 56 | 6  | 0 | -2.092604 | -4.947479  | 2.277983  |
| 57 | 6  | 0 | 3.303842  | -4.175754  | 5.276641  |
| 58 | 6  | 0 | -2.477264 | -5.485033  | 4.605822  |
| 59 | 6  | 0 | 3.466323  | -5.032813  | 0.000000  |
| 60 | 6  | 0 | -1.772346 | -5.698006  | 3.416493  |
| 61 | 6  | 0 | -0.340090 | -10.328773 | 3.088764  |
| 62 | 6  | 0 | 2.644717  | -6.291536  | 0.000000  |
| 63 | 6  | 0 | -0.698981 | -6.736892  | 3.353109  |
| 64 | 8  | 0 | -0.904678 | 8.115608   | 0.000000  |
| 65 | 8  | 0 | 0.513090  | 8.556093   | -3.375970 |
| 66 | 8  | 0 | -1.068767 | 6.748450   | -2.262491 |
| 67 | 8  | 0 | 0.892793  | 9.778274   | -5.546966 |
| 68 | 8  | 0 | 1.312924  | 7.135228   | -1.131729 |
| 69 | 8  | 0 | -1.648248 | 10.118525  | -4.171232 |
| 70 | 8  | 0 | 0.903399  | 9.860663   | -1.135719 |
| 71 | 8  | 0 | -1.764418 | 7.369027   | -4.313278 |
| 72 | 8  | 0 | -1.680766 | 9.478476   | -1.994176 |
| 73 | 8  | 0 | 0.661783  | 6.928642   | -5.420537 |
| 74 | 1  | 0 | -1.764396 | 8.561770   | 0.000000  |
| 75 | 1  | 0 | 1.155055  | 9.279060   | -3.459028 |
| 76 | 1  | 0 | -2.005669 | 4.702511   | -1.424883 |
| 77 | 1  | 0 | -3.518972 | 2.715867   | -1.436052 |
| 78 | 1  | 0 | 2.759340  | 5.459628   | -2.138768 |
| 79 | 1  | 0 | -4.054961 | -4.380174  | -5.572587 |
| 80 | 1  | 0 | -5.010321 | 3.889004   | -5.283227 |
| 81 | 1  | 0 | -3.461791 | 5.848692   | -5.279367 |
| 82 | 1  | 0 | 1.615699  | 4.777803   | -4.638412 |
| 83 | 1  | 0 | -3.388204 | -3.434792  | -1.442854 |
| 84 | 13 | 0 | -0.511437 | 8.774600   | -5.001153 |
| 85 | 13 | 0 | -0.142646 | 8.300323   | -1.681586 |
| 86 | 6  | 0 | -2.656510 | 4.503217   | -2.269081 |
| 87 | 6  | 0 | -3.505070 | 3.401266   | -2.276837 |
| 88 | 6  | 0 | 3.119279  | 5.028949   | -1.210954 |
| 89 | 6  | 0 | -3.501704 | -4.543382  | -4.652175 |
| 90 | 6  | 0 | -4.347263 | 4.064525   | -4.441269 |
| 91 | 6  | 0 | -3.487407 | 5.159170   | -4.442902 |
| 92 | 6  | 0 | 2.529321  | 4.849440   | -5.219033 |
| 93 | 6  | 0 | -3.114168 | -4.004130  | -2.326055 |
| 94 | 6  | 0 | -2.644929 | 5.392195   | -3.351068 |
| 95 | 6  | 0 | -4.371866 | 3.175128   | -3.356406 |
| 96 | 6  | 0 | 2.666234  | 5.568763   | 0.000000  |
| 97 | 6  | 0 | -3.834422 | -3.799002  | -3.512376 |
| 98 | 6  | 0 | -1.756551 | 6.594056   | -3.318728 |
| 99 | 6  | 0 | 1.680479  | 6.707460   | 0.000000  |

|     |    |   |           |            |           |
|-----|----|---|-----------|------------|-----------|
| 100 | 6  | 0 | -2.040633 | 10.182082  | -2.982571 |
| 101 | 8  | 0 | 0.350666  | -8.179988  | 0.000000  |
| 102 | 8  | 0 | 1.881604  | -8.261156  | -3.361302 |
| 103 | 8  | 0 | -0.124412 | -9.624395  | -2.058841 |
| 104 | 8  | 0 | 1.856275  | -6.588965  | -5.389469 |
| 105 | 8  | 0 | 2.462953  | -9.517636  | -1.136038 |
| 106 | 8  | 0 | -0.499067 | -7.441388  | -4.379546 |
| 107 | 8  | 0 | 2.340077  | -6.766777  | -1.130396 |
| 108 | 8  | 0 | 0.050998  | -10.140527 | -4.264266 |
| 109 | 8  | 0 | -0.080497 | -6.837901  | -2.249150 |
| 110 | 8  | 0 | 2.555666  | -9.358696  | -5.530054 |
| 111 | 1  | 0 | -0.406975 | -8.782906  | 0.000000  |
| 112 | 1  | 0 | 2.651888  | -8.847524  | -3.426814 |
| 113 | 1  | 0 | 2.364508  | -4.232702  | -4.736755 |
| 114 | 1  | 0 | -2.212422 | -6.068296  | -5.480672 |
| 115 | 1  | 0 | 3.540263  | -4.915680  | -2.138941 |
| 116 | 1  | 0 | -1.541128 | -5.130322  | -1.362054 |
| 117 | 13 | 0 | 0.986333  | -8.606984  | -5.027964 |
| 118 | 13 | 0 | 1.138947  | -8.180179  | -1.683399 |
| 119 | 6  | 0 | 3.303842  | -4.175754  | -5.276641 |
| 120 | 6  | 0 | -2.477264 | -5.485033  | -4.605822 |
| 121 | 6  | 0 | 3.844901  | -4.441825  | -1.212329 |
| 122 | 6  | 0 | -2.092604 | -4.947479  | -2.277983 |
| 123 | 6  | 0 | 3.775291  | -5.332407  | -5.923336 |
| 124 | 6  | 0 | -1.772346 | -5.698006  | -3.416493 |
| 125 | 6  | 0 | -0.340090 | -10.328773 | -3.088764 |
| 126 | 6  | 0 | 2.996816  | -6.588176  | -5.829724 |
| 127 | 6  | 0 | 2.825855  | -9.923104  | 0.000000  |
| 128 | 6  | 0 | -0.698981 | -6.736892  | -3.353109 |
| 129 | 8  | 0 | 6.335670  | 0.532423   | 3.301165  |
| 130 | 8  | 0 | 7.552822  | 0.805551   | 6.702144  |
| 131 | 8  | 0 | 6.094417  | -0.928660  | 1.123785  |
| 132 | 8  | 0 | 8.201811  | 2.154996   | 4.427288  |
| 133 | 8  | 0 | 8.508128  | -0.683162  | 2.283592  |
| 134 | 8  | 0 | 5.553575  | 1.940237   | 5.273220  |
| 135 | 8  | 0 | 8.319798  | 2.036314   | 2.163931  |
| 136 | 8  | 0 | 5.760236  | -0.768251  | 5.436356  |
| 137 | 8  | 0 | 5.809639  | 1.830391   | 1.126214  |
| 138 | 8  | 0 | 8.390557  | -0.665309  | 4.546766  |
| 139 | 1  | 0 | 5.411379  | 0.809427   | 3.246180  |
| 140 | 1  | 0 | 4.896338  | -2.804257  | 2.144997  |
| 141 | 1  | 0 | 3.319532  | 2.923020   | 4.665432  |
| 142 | 1  | 0 | 3.719501  | -2.109129  | 4.820784  |
| 143 | 1  | 0 | 4.371311  | 3.542107   | 2.144774  |
| 144 | 13 | 0 | 7.087079  | 0.670687   | 5.000808  |
| 145 | 13 | 0 | 7.160473  | 0.548909   | 1.642091  |
| 146 | 6  | 0 | 4.595321  | -3.271458  | 1.213510  |
| 147 | 6  | 0 | 3.465423  | 3.833220   | 5.236656  |
| 148 | 6  | 0 | 4.046527  | -3.010521  | 5.327463  |
| 149 | 6  | 0 | 4.011827  | 3.962073   | 1.211512  |
| 150 | 6  | 0 | 5.259650  | -2.987478  | 6.046389  |
| 151 | 6  | 0 | 4.464354  | 3.417594   | 0.000000  |
| 152 | 6  | 0 | 6.077148  | -1.788591  | 6.062276  |
| 153 | 6  | 0 | 8.571390  | 2.547897   | 3.285325  |
| 154 | 6  | 0 | 8.820226  | -1.080561  | 3.430483  |
| 155 | 6  | 0 | 5.428028  | 2.280706   | 0.000000  |

|     |    |   |          |           |           |
|-----|----|---|----------|-----------|-----------|
| 156 | 8  | 0 | 6.335670 | 0.532423  | -3.301165 |
| 157 | 8  | 0 | 8.013570 | 0.627167  | 0.000000  |
| 158 | 8  | 0 | 5.760236 | -0.768251 | -5.436356 |
| 159 | 8  | 0 | 8.319798 | 2.036314  | -2.163931 |
| 160 | 8  | 0 | 8.390557 | -0.665309 | -4.546766 |
| 161 | 8  | 0 | 5.809639 | 1.830391  | -1.126214 |
| 162 | 8  | 0 | 8.201811 | 2.154996  | -4.427288 |
| 163 | 8  | 0 | 6.094417 | -0.928660 | -1.123785 |
| 164 | 8  | 0 | 5.553575 | 1.940237  | -5.273220 |
| 165 | 8  | 0 | 8.508128 | -0.683162 | -2.283592 |
| 166 | 1  | 0 | 5.411379 | 0.809427  | -3.246180 |
| 167 | 1  | 0 | 8.766103 | 1.234943  | 0.000000  |
| 168 | 1  | 0 | 3.719501 | -2.109129 | -4.820784 |
| 169 | 1  | 0 | 4.371311 | 3.542107  | -2.144774 |
| 170 | 1  | 0 | 4.896338 | -2.804257 | -2.144997 |
| 171 | 1  | 0 | 3.319532 | 2.923020  | -4.665432 |
| 172 | 13 | 0 | 7.160473 | 0.548909  | -1.642091 |
| 173 | 13 | 0 | 7.087079 | 0.670687  | -5.000808 |
| 174 | 6  | 0 | 4.046527 | -3.010521 | -5.327463 |
| 175 | 6  | 0 | 4.011827 | 3.962073  | -1.211512 |
| 176 | 6  | 0 | 4.595321 | -3.271458 | -1.213510 |
| 177 | 6  | 0 | 3.465423 | 3.833220  | -5.236656 |
| 178 | 6  | 0 | 4.975113 | -2.678673 | 0.000000  |
| 179 | 6  | 0 | 4.632946 | 3.973933  | -6.015185 |
| 180 | 6  | 0 | 5.779360 | -1.429097 | 0.000000  |
| 181 | 6  | 0 | 8.571390 | 2.547897  | -3.285325 |
| 182 | 6  | 0 | 8.820226 | -1.080561 | -3.430483 |
| 183 | 6  | 0 | 5.640145 | 2.932086  | -6.012720 |
| 184 | 6  | 0 | 3.927211 | 6.173202  | 6.718650  |
| 185 | 6  | 0 | 4.632946 | 3.973933  | 6.015185  |
| 186 | 6  | 0 | 2.763060 | 6.023921  | -5.956700 |
| 187 | 6  | 0 | 4.856125 | 5.139897  | -6.764642 |
| 188 | 6  | 0 | 4.856125 | 5.139897  | 6.764642  |
| 189 | 6  | 0 | 3.927211 | 6.173202  | -6.718650 |
| 190 | 1  | 0 | 4.091220 | 7.093556  | 7.271548  |
| 191 | 1  | 0 | 5.760815 | 5.232233  | 7.359331  |
| 192 | 1  | 0 | 4.091220 | 7.093556  | -7.271548 |
| 193 | 1  | 0 | 5.760815 | 5.232233  | -7.359331 |
| 194 | 6  | 0 | 5.640145 | 2.932086  | 6.012720  |
| 195 | 6  | 0 | 1.773814 | 7.122321  | -5.889333 |
| 196 | 1  | 0 | 6.514296 | 3.015556  | 6.670540  |
| 197 | 1  | 0 | 2.041539 | 8.140620  | -6.213807 |
| 198 | 6  | 0 | 5.722888 | -4.139643 | 6.701201  |
| 199 | 6  | 0 | 3.775291 | -5.332407 | 5.923336  |
| 200 | 6  | 0 | 5.259650 | -2.987478 | -6.046389 |
| 201 | 6  | 0 | 4.985406 | -5.315721 | -6.626533 |
| 202 | 1  | 0 | 6.662015 | -4.107597 | 7.247034  |
| 203 | 1  | 0 | 5.335979 | -6.223317 | -7.109341 |
| 204 | 6  | 0 | 4.985406 | -5.315721 | 6.626533  |
| 205 | 6  | 0 | 5.722888 | -4.139643 | -6.701201 |
| 206 | 1  | 0 | 6.662015 | -4.107597 | -7.247034 |
| 207 | 1  | 0 | 5.335979 | -6.223317 | 7.109341  |
| 208 | 6  | 0 | 6.077148 | -1.788591 | -6.062276 |
| 209 | 6  | 0 | 2.996816 | -6.588176 | 5.829724  |
| 210 | 1  | 0 | 7.019411 | -1.794457 | -6.625621 |
| 211 | 1  | 0 | 3.449398 | -7.549978 | 6.120680  |

|     |   |   |            |            |           |
|-----|---|---|------------|------------|-----------|
| 212 | 1 | 0 | 7.019411   | -1.794457  | 6.625621  |
| 213 | 1 | 0 | 3.449398   | -7.549978  | -6.120680 |
| 214 | 1 | 0 | 6.514296   | 3.015556   | -6.670540 |
| 215 | 1 | 0 | 2.041539   | 8.140620   | 6.213807  |
| 216 | 1 | 0 | 1.759269   | 11.266407  | 0.000000  |
| 217 | 1 | 0 | -0.960238  | -11.224077 | -2.922251 |
| 218 | 1 | 0 | -0.960238  | -11.224077 | 2.922251  |
| 219 | 1 | 0 | -2.803366  | 10.946272  | 2.763868  |
| 220 | 1 | 0 | -2.803366  | 10.946272  | -2.763868 |
| 221 | 1 | 0 | 9.198649   | 3.451205   | 3.271521  |
| 222 | 1 | 0 | 9.198649   | 3.451205   | -3.271521 |
| 223 | 1 | 0 | 9.566919   | -1.885797  | -3.478458 |
| 224 | 1 | 0 | 9.566919   | -1.885797  | 3.478458  |
| 225 | 1 | 0 | 3.565672   | -10.738935 | 0.000000  |
| 226 | 8 | 0 | 7.552822   | 0.805551   | -6.702144 |
| 227 | 8 | 0 | 0.239961   | -8.605342  | -6.642388 |
| 228 | 8 | 0 | -1.314073  | 8.668629   | -6.583648 |
| 229 | 1 | 0 | 2.394497   | -9.830623  | -6.358839 |
| 230 | 1 | 0 | 2.394497   | -9.830623  | 6.358839  |
| 231 | 1 | 0 | 0.622873   | 10.233814  | -6.356436 |
| 232 | 1 | 0 | 0.622873   | 10.233814  | 6.356436  |
| 233 | 1 | 0 | 8.500471   | 0.944307   | 6.821761  |
| 234 | 1 | 0 | -0.651145  | -8.235219  | 6.624283  |
| 235 | 1 | 0 | -2.120443  | 8.139962   | 6.543869  |
| 236 | 1 | 0 | -2.120443  | 8.139962   | -6.543869 |
| 237 | 1 | 0 | 8.500471   | 0.944307   | -6.821761 |
| 238 | 1 | 0 | -0.651145  | -8.235219  | -6.624283 |
| 239 | 7 | 0 | -7.741473  | 1.489027   | 3.147543  |
| 240 | 7 | 0 | -5.580616  | -0.429144  | 3.392548  |
| 241 | 7 | 0 | -7.434975  | -2.705348  | 3.374845  |
| 242 | 7 | 0 | -9.605038  | -0.789111  | 2.976282  |
| 243 | 6 | 0 | -8.932710  | 2.162069   | 3.016036  |
| 244 | 6 | 0 | -8.612371  | 3.557061   | 2.963919  |
| 245 | 6 | 0 | -7.250577  | 3.686799   | 3.061487  |
| 246 | 6 | 0 | -6.687704  | 2.371913   | 3.192910  |
| 247 | 6 | 0 | -5.335159  | 2.033406   | 3.331211  |
| 248 | 6 | 0 | -4.837019  | 0.719469   | 3.430368  |
| 249 | 6 | 0 | -3.416856  | 0.414345   | 3.582228  |
| 250 | 6 | 0 | -3.318265  | -0.938454  | 3.608823  |
| 251 | 6 | 0 | -4.679569  | -1.454305  | 3.490965  |
| 252 | 6 | 0 | -4.971787  | -2.830266  | 3.519691  |
| 253 | 6 | 0 | -6.252284  | -3.392833  | 3.492005  |
| 254 | 6 | 0 | -6.593279  | -4.787504  | 3.546862  |
| 255 | 6 | 0 | -7.957832  | -4.893390  | 3.457002  |
| 256 | 6 | 0 | -8.498235  | -3.573226  | 3.321355  |
| 257 | 6 | 0 | -9.831282  | -3.224745  | 3.130150  |
| 258 | 6 | 0 | -10.346690 | -1.934593  | 2.993885  |
| 259 | 6 | 0 | -11.775365 | -1.635539  | 3.009673  |
| 260 | 6 | 0 | -11.878317 | -0.281980  | 2.999720  |
| 261 | 6 | 0 | -10.511617 | 0.230263   | 2.979061  |
| 262 | 6 | 0 | -10.199819 | 1.590358   | 2.964622  |
| 263 | 1 | 0 | -9.344810  | 4.345477   | 2.854421  |
| 264 | 1 | 0 | -6.670697  | 4.597082   | 3.044202  |
| 265 | 1 | 0 | -2.623882  | 1.144365   | 3.656697  |
| 266 | 1 | 0 | -2.428662  | -1.542940  | 3.712380  |
| 267 | 1 | 0 | -5.872315  | -5.585693  | 3.638092  |

|     |    |   |            |           |           |
|-----|----|---|------------|-----------|-----------|
| 268 | 1  | 0 | -8.552253  | -5.797067 | 3.456067  |
| 269 | 1  | 0 | -10.540339 | -4.047032 | 3.123271  |
| 270 | 1  | 0 | -12.568548 | -2.372694 | 3.031208  |
| 271 | 1  | 0 | -12.774146 | 0.326649  | 3.011436  |
| 272 | 1  | 0 | -11.030706 | 2.287983  | 2.917815  |
| 273 | 7  | 0 | -7.434975  | -2.705348 | -3.374845 |
| 274 | 7  | 0 | -5.580616  | -0.429144 | -3.392548 |
| 275 | 7  | 0 | -7.741473  | 1.489027  | -3.147543 |
| 276 | 7  | 0 | -9.605038  | -0.789111 | -2.976282 |
| 277 | 6  | 0 | -8.498235  | -3.573226 | -3.321355 |
| 278 | 6  | 0 | -7.957832  | -4.893390 | -3.457002 |
| 279 | 6  | 0 | -6.593279  | -4.787504 | -3.546862 |
| 280 | 6  | 0 | -6.252284  | -3.392833 | -3.492005 |
| 281 | 6  | 0 | -4.971787  | -2.830266 | -3.519691 |
| 282 | 6  | 0 | -4.679569  | -1.454305 | -3.490965 |
| 283 | 6  | 0 | -3.318265  | -0.938454 | -3.608823 |
| 284 | 6  | 0 | -3.416856  | 0.414345  | -3.582228 |
| 285 | 6  | 0 | -4.837019  | 0.719469  | -3.430368 |
| 286 | 6  | 0 | -5.335159  | 2.033406  | -3.331211 |
| 287 | 6  | 0 | -6.687704  | 2.371913  | -3.192910 |
| 288 | 6  | 0 | -7.250577  | 3.686799  | -3.061487 |
| 289 | 6  | 0 | -8.612371  | 3.557061  | -2.963919 |
| 290 | 6  | 0 | -8.932710  | 2.162069  | -3.016036 |
| 291 | 6  | 0 | -10.199819 | 1.590358  | -2.964622 |
| 292 | 6  | 0 | -10.511617 | 0.230263  | -2.979061 |
| 293 | 6  | 0 | -11.878317 | -0.281980 | -2.999720 |
| 294 | 6  | 0 | -11.775365 | -1.635539 | -3.009673 |
| 295 | 6  | 0 | -10.346690 | -1.934593 | -2.993885 |
| 296 | 6  | 0 | -9.831282  | -3.224745 | -3.130150 |
| 297 | 1  | 0 | -8.552253  | -5.797067 | -3.456067 |
| 298 | 1  | 0 | -5.872315  | -5.585693 | -3.638092 |
| 299 | 1  | 0 | -2.428662  | -1.542940 | -3.712380 |
| 300 | 1  | 0 | -2.623882  | 1.144365  | -3.656697 |
| 301 | 1  | 0 | -6.670697  | 4.597082  | -3.044202 |
| 302 | 1  | 0 | -9.344810  | 4.345477  | -2.854421 |
| 303 | 1  | 0 | -11.030706 | 2.287983  | -2.917815 |
| 304 | 1  | 0 | -12.774146 | 0.326649  | -3.011436 |
| 305 | 1  | 0 | -12.568548 | -2.372694 | -3.031208 |
| 306 | 1  | 0 | -10.540339 | -4.047032 | -3.123271 |
| 307 | 16 | 0 | -5.965937  | -2.053994 | 0.000000  |
| 308 | 6  | 0 | -7.775858  | -2.343220 | 0.000000  |
| 309 | 1  | 0 | -8.208671  | -1.864376 | -0.882907 |
| 310 | 1  | 0 | -8.208671  | -1.864376 | 0.882907  |
| 311 | 6  | 0 | -5.968594  | -0.224491 | 0.000000  |
| 312 | 1  | 0 | -6.501256  | 0.118544  | -0.891066 |
| 313 | 1  | 0 | -6.501256  | 0.118544  | 0.891066  |
| 314 | 6  | 0 | -4.538792  | 0.301005  | 0.000000  |
| 315 | 1  | 0 | -3.993897  | -0.029331 | -0.888318 |
| 316 | 1  | 0 | -4.557163  | 1.396599  | 0.000000  |
| 317 | 1  | 0 | -3.993897  | -0.029331 | 0.888318  |
| 318 | 6  | 0 | -8.053944  | -3.841825 | 0.000000  |
| 319 | 1  | 0 | -9.134614  | -4.022469 | 0.000000  |
| 320 | 1  | 0 | -7.627522  | -4.322044 | -0.883350 |
| 321 | 1  | 0 | -7.627522  | -4.322044 | 0.883350  |
| 322 | 1  | 0 | -7.644193  | 0.480277  | -3.206427 |
| 323 | 1  | 0 | -7.503656  | -1.699476 | -3.261239 |



|     |   |   |           |           |          |
|-----|---|---|-----------|-----------|----------|
| 324 | 1 | 0 | -7.644193 | 0.480277  | 3.206427 |
| 325 | 1 | 0 | -7.503656 | -1.699476 | 3.261239 |

---
